# Supplementary material for: Uncommon functional properties of the first piscine 26S proteasome from the Antarctic notothenioid Trematomus bernacchii
Source: Oxford University Press journal article supplement (doi:10.1042/bsr20160022), 2016-03-02
Supplement: bsr036e320add.pdf [file bsr036e320add.pdf]

**Table S1: Purification procedure of 26S proteasome isoform from *T. bernacchii* red blood cells (RBCs)**

| <b>Purification step</b>   | <b>Total activity (U)</b> | <b>Total protein (mg)</b> | <b>Specific activity (U/mg)</b> | <b>U/ml blood</b> | <b>Purification fold</b> | <b>Yield (%)</b> |
|----------------------------|---------------------------|---------------------------|---------------------------------|-------------------|--------------------------|------------------|
| <b>Extract</b>             | 645120                    | 99.4                      | 6490                            | 586473            | 1                        | 100              |
| <b>DEAE</b>                | 303206                    | 18.8                      | 16128                           | -                 | 2.5                      | 47               |
| <b>Phenyl peak 1</b>       | 30321                     | 1.4                       | 21658                           | -                 | 3.3                      | 4.7              |
| <b>Phenyl peak 2</b>       | 23953                     | 2.9                       | 8260                            | -                 | 1.3                      | 3.7              |
| <b>Superdex 200 peak 1</b> | 758                       | 0.02                      | 37900                           | -                 | 5.8                      | 0.1              |

The proteasome activity was measured using LLVY as substrate and expressed assuming  $\epsilon=1 \text{ mM}^{-1} \text{ cm}^{-1}$

**Table S2: Structural analysis of the ten models obtained for the seven proteasome subunits.** Analyses have been performed with PROCHECK, PROSA web and Hbplus. Columns concerning the PROCHECK analysis report, as absolute numbers and percentage, the amino acids falling in the Ramachandran plot regions (most favoured, additional favoured, generously allowed, disallowed). PROSA web results report the Z-score obtained, which give a whole measure of the quality of the model in comparison to the value obtained for the template chain (last line for each table). The Hbplus column reports the number of H-bonds observed for each model. This is not a measure of model quality, but it is reported for a comparison among models and to the template chain.

#### Subunit alpha 4

| PROCHECK                     |                                   |                   |                   |                      |                   |                   |                |               | PROSA web    | Hbplus     |
|------------------------------|-----------------------------------|-------------------|-------------------|----------------------|-------------------|-------------------|----------------|---------------|--------------|------------|
|                              | Number of amino acids in regions: |                   |                   |                      | Percentage        |                   |                |               |              |            |
|                              | <i>Most favoured</i>              | <i>Generously</i> |                   | <i>Most favoured</i> | <i>Generously</i> |                   | <i>Z-score</i> |               |              |            |
|                              | <i>Additional</i>                 | <i>Disallowed</i> | <i>Disallowed</i> | <i>Additional</i>    | <i>Disallowed</i> | <i>Disallowed</i> |                | <i>Hbonds</i> |              |            |
| <b>Model 1</b>               | 214                               | 10                | 0                 | 0                    | 95.5              | 4.5               | 0              | 0             | -7.12        | 214        |
| <b>Model 2</b>               | 215                               | 9                 | 0                 | 0                    | 96                | 4                 | 0              | 0             | -7.07        | 208        |
| <b>Model 3</b>               | 215                               | 9                 | 0                 | 0                    | 96                | 4                 | 0              | 0             | -7.04        | 214        |
| <b>Model 4</b>               | <b>215</b>                        | <b>9</b>          | <b>0</b>          | <b>0</b>             | <b>96</b>         | <b>4</b>          | <b>0</b>       | <b>0</b>      | <b>-7.24</b> | <b>208</b> |
| <b>Model 5</b>               | 214                               | 10                | 0                 | 0                    | 95.5              | 4.5               | 0              | 0             | -7.1         | 209        |
| <b>Model 6</b>               | 211                               | 13                | 0                 | 0                    | 94.2              | 5.8               | 0              | 0             | -7.14        | 201        |
| <b>Model 7</b>               | 215                               | 9                 | 0                 | 0                    | 96                | 4                 | 0              | 0             | -7.11        | 213        |
| <b>Model 8</b>               | 215                               | 9                 | 0                 | 0                    | 96                | 4                 | 0              | 0             | -7.12        | 207        |
| <b>Model 9</b>               | 215                               | 9                 | 0                 | 0                    | 96                | 4                 | 0              | 0             | -7.11        | 208        |
| <b>Model 10</b>              | 215                               | 9                 | 0                 | 0                    | 96                | 4                 | 0              | 0             | -7.14        | 201        |
| Template:<br>3UNB_B<br>248aa |                                   |                   |                   |                      |                   |                   |                |               | -7.12        | 204        |

### Subunit alpha 5

| PROCHECK                     |                                   |          |                   |          |                      |            |                   |          | PROSA web    | Hbplus     |
|------------------------------|-----------------------------------|----------|-------------------|----------|----------------------|------------|-------------------|----------|--------------|------------|
|                              | Number of amino acids in regions: |          |                   |          | Percentage           |            |                   |          |              |            |
|                              | <i>Most favoured</i>              |          | <i>Generously</i> |          | <i>Most favoured</i> |            | <i>Generously</i> |          | Z-score      | Hbonds     |
|                              | <i>Additional</i>                 |          | <i>Disallowed</i> |          | <i>Additional</i>    |            | <i>Disallowed</i> |          |              |            |
| Model 1                      | 199                               | 7        | 0                 | 0        | 96.6                 | 3.4        | 0                 | 0        | -7.44        | 179        |
| Model 2                      | 197                               | 9        | 0                 | 0        | 95.6                 | 4.4        | 0                 | 0        | -7.61        | 178        |
| Model 3                      | <b>200</b>                        | <b>5</b> | <b>1</b>          | <b>0</b> | <b>97.1</b>          | <b>2.4</b> | <b>0.5</b>        | <b>0</b> | <b>-7.52</b> | <b>181</b> |
| Model 4                      | 199                               | 7        | 0                 | 0        | 96.6                 | 3.4        | 0                 | 0        | -7.51        | 168        |
| Model 5                      | 198                               | 7        | 1                 | 0        | 96.1                 | 3.4        | 0.5               | 0        | -7.37        | 190        |
| Model 6                      | 196                               | 10       | 0                 | 0        | 95.1                 | 4.9        | 0                 | 0        | -7.57        | 183        |
| Model 7                      | 198                               | 7        | 1                 | 0        | 96.6                 | 3.4        | 0.5               | 0        | -7.4         | 185        |
| Model 8                      | 198                               | 8        | 0                 | 0        | 96.6                 | 3.9        | 0                 | 0        | -7.41        | 180        |
| Model 9                      | 198                               | 8        | 0                 | 0        | 96.6                 | 3.9        | 0                 | 0        | -7.58        | 179        |
| Model 10                     | 198                               | 8        | 0                 | 0        | 96.6                 | 3.9        | 0                 | 0        | -7.46        | 179        |
| Template:<br>3UNB_D<br>233aa |                                   |          |                   |          |                      |            |                   |          | -7.24        | 176        |

## Subunit alpha 7

| PROCHECK                          |                      |                   |                   |                      |                   |            |                |          | PROSA web     | Hbplus     |
|-----------------------------------|----------------------|-------------------|-------------------|----------------------|-------------------|------------|----------------|----------|---------------|------------|
| Number of amino acids in regions: |                      |                   |                   |                      | Percentage        |            |                |          |               |            |
|                                   | <i>Most favoured</i> | <i>Generously</i> |                   | <i>Most favoured</i> | <i>Generously</i> |            | <i>Z-score</i> |          | <i>Hbonds</i> |            |
|                                   | <i>Additional</i>    | <i>Disallowed</i> | <i>Additional</i> | <i>Disallowed</i>    |                   |            |                |          |               |            |
| <b>Model 1</b>                    | 207                  | 6                 | 3                 | 0                    | 95.8              | 2.8        | 1.4            | 0        | -7.32         | 173        |
| <b>Model 2</b>                    | 206                  | 7                 | 3                 | 0                    | 95.4              | 3.2        | 1.4            | 0        | -7.33         | 166        |
| <b>Model 3</b>                    | 206                  | 6                 | 3                 | 1                    | 95.4              | 2.8        | 1.4            | 0.5      | -7.28         | 175        |
| <b>Model 4</b>                    | 206                  | 7                 | 3                 | 0                    | 95.4              | 3.2        | 1.4            | 0        | -7.4          | 165        |
| <b>Model 5</b>                    | 206                  | 7                 | 3                 | 0                    | 95.4              | 3.2        | 1.4            | 0        | -7.37         | 168        |
| <b>Model 6</b>                    | 207                  | 5                 | 3                 | 1                    | 95.8              | 2.3        | 1.4            | 0.5      | -7.39         | 168        |
| <b>Model 7</b>                    | 208                  | 5                 | 3                 | 0                    | 96.3              | 2.3        | 1.4            | 0        | -7.43         | 179        |
| <b>Model 8</b>                    | 203                  | 10                | 3                 | 0                    | 94                | 4.6        | 1.4            | 0        | -7.37         | 183        |
| <b>Model 9</b>                    | <b>209</b>           | <b>4</b>          | <b>3</b>          | <b>0</b>             | <b>96.8</b>       | <b>1.9</b> | <b>1.4</b>     | <b>0</b> | <b>-7.38</b>  | <b>162</b> |
| <b>Model 10</b>                   | 208                  | 5                 | 3                 | 0                    | 96.3              | 2.3        | 1.4            | 0        | -7.27         | 168        |
| Template:<br>3UNB_C<br>239aa      |                      |                   |                   |                      |                   |            |                |          | -7.97         | 157        |

### Subunit beta 1

| PROCHECK                      |                                   |          |                   |          |                      |            |                   |            | PROSA web    | Hbplus     |
|-------------------------------|-----------------------------------|----------|-------------------|----------|----------------------|------------|-------------------|------------|--------------|------------|
|                               | Number of amino acids in regions: |          |                   |          | Percentage           |            |                   |            |              |            |
|                               | <i>Most favoured</i>              |          | <i>Generously</i> |          | <i>Most favoured</i> |            | <i>Generously</i> |            | Z-score      | Hbonds     |
|                               | <i>Additional</i>                 |          | <i>Disallowed</i> |          | <i>Additional</i>    |            | <i>Disallowed</i> |            |              |            |
| <b>Model 1</b>                | 175                               | 9        | 0                 | 1        | 94.6                 | 4.9        | 0                 | 0.5        | -7.85        | 159        |
| <b>Model 2</b>                | <b>176</b>                        | <b>8</b> | <b>0</b>          | <b>1</b> | <b>95.1</b>          | <b>4.3</b> | <b>0</b>          | <b>0.5</b> | <b>-7.96</b> | <b>169</b> |
| <b>Model 3</b>                | 174                               | 10       | 0                 | 1        | 94.1                 | 5.4        | 0                 | 0.5        | -7.98        | 166        |
| <b>Model 4</b>                | 174                               | 10       | 0                 | 1        | 94.1                 | 5.4        | 0                 | 0.5        | -7.97        | 159        |
| <b>Model 5</b>                | 174                               | 10       | 0                 | 1        | 94.1                 | 5.4        | 0                 | 0.5        | -7.98        | 166        |
| <b>Model 6</b>                | 174                               | 10       | 0                 | 1        | 94.1                 | 5.4        | 0                 | 0.5        | -7.92        | 154        |
| <b>Model 7</b>                | 173                               | 11       | 0                 | 1        | 93.5                 | 5.9        | 0                 | 0.5        | -7.97        | 161        |
| <b>Model 8</b>                | 175                               | 9        | 0                 | 1        | 94.6                 | 4.9        | 0                 | 0.5        | -7.88        | 169        |
| <b>Model 9</b>                | 174                               | 10       | 0                 | 1        | 94.1                 | 5.4        | 0                 | 0.5        | -7.89        | 170        |
| <b>Model 10</b>               | 173                               | 11       | 0                 | 1        | 93.5                 | 5.9        | 0                 | 0.5        | -7.96        | 158        |
| Template:<br>3UNB_L<br>213 aa |                                   |          |                   |          |                      |            |                   |            | -7.78        | 177        |

## Subunit beta 2

| PROCHECK                          |                      |          |                   |          |                      |            |                   |          | PROSA web    | Hbplus     |
|-----------------------------------|----------------------|----------|-------------------|----------|----------------------|------------|-------------------|----------|--------------|------------|
| Number of amino acids in regions: |                      |          |                   |          | Percentage           |            |                   |          |              |            |
|                                   | <i>Most favoured</i> |          | <i>Generously</i> |          | <i>Most favoured</i> |            | <i>Generously</i> |          | Z-score      | Hbonds     |
|                                   | <i>Additional</i>    |          | <i>Disallowed</i> |          | <i>Additional</i>    |            | <i>Disallowed</i> |          |              |            |
| <b>Model 1</b>                    | 168                  | 10       | 0                 | 0        | 94.4                 | 5.6        | 0                 | 0        | -6.41        | 146        |
| <b>Model 2</b>                    | 166                  | 11       | 1                 | 0        | 93.3                 | 6.2        | 0.6               | 0        | -6.58        | 154        |
| <b>Model 3</b>                    | 167                  | 10       | 1                 | 0        | 93.8                 | 5.6        | 0.6               | 0        | -6.51        | 160        |
| <b>Model 4</b>                    | 168                  | 10       | 0                 | 0        | 94.4                 | 5.6        | 0                 | 0        | -6.38        | 152        |
| <b>Model 5</b>                    | 168                  | 10       | 0                 | 0        | 94.4                 | 5.6        | 0                 | 0        | -6.44        | 153        |
| <b>Model 6</b>                    | <b>170</b>           | <b>7</b> | <b>1</b>          | <b>0</b> | <b>95.5</b>          | <b>3.9</b> | <b>0.6</b>        | <b>0</b> | <b>-6.38</b> | <b>158</b> |
| <b>Model 7</b>                    | 167                  | 11       | 0                 | 0        | 93.8                 | 6.2        | 0                 | 0        | -6.50        | 154        |
| <b>Model 8</b>                    | 167                  | 11       | 0                 | 0        | 93.8                 | 6.2        | 0                 | 0        | -6.52        | 155        |
| <b>Model 9</b>                    | 167                  | 10       | 1                 | 0        | 93.8                 | 5.6        | 0.6               | 0        | -6.42        | 156        |
| <b>Model 10</b>                   | 168                  | 9        | 1                 | 0        | 94,4                 | 5.1        | 0.6               | 0        | -6.50        | 155        |
| Template:<br>3UNB_J<br>196 aa     |                      |          |                   |          |                      |            |                   |          | -5.98        | 151        |

### Subunit beta 3

| PROCHECK                      |                                   |          |                   |          |                      |            |                   |            | PROSA web    | Hbplus     |
|-------------------------------|-----------------------------------|----------|-------------------|----------|----------------------|------------|-------------------|------------|--------------|------------|
|                               | Number of amino acids in regions: |          |                   |          | Percentage           |            |                   |            |              |            |
|                               | <i>Most favoured</i>              |          | <i>Generously</i> |          | <i>Most favoured</i> |            | <i>Generously</i> |            | Z-score      | Hbonds     |
|                               | <i>Additional</i>                 |          | <i>Disallowed</i> |          | <i>Additional</i>    |            | <i>Disallowed</i> |            |              |            |
| <b>Model 1</b>                | 168                               | 7        | 1                 | 2        | 94.4                 | 3.9        | 0,6               | 1.1        | -8.49        | 152        |
| <b>Model 2</b>                | 168                               | 7        | 1                 | 2        | 94.4                 | 3.9        | 0,6               | 1.1        | -8.35        | 152        |
| <b>Model 3</b>                | 168                               | 7        | 1                 | 2        | 94.4                 | 3.9        | 0,6               | 1.1        | -8.44        | 149        |
| <b>Model 4</b>                | 169                               | 6        | 1                 | 2        | 94.9                 | 3.4        | 0,6               | 1.1        | -8.46        | 151        |
| <b>Model 5</b>                | 168                               | 7        | 1                 | 2        | 94.4                 | 3.9        | 0,6               | 1.1        | -8.50        | 149        |
| <b>Model 6</b>                | 168                               | 7        | 1                 | 2        | 94.4                 | 3.9        | 0,6               | 1.1        | -8.55        | 151        |
| <b>Model 7</b>                | 169                               | 6        | 1                 | 2        | 94.9                 | 3.4        | 0,6               | 1.1        | -8.42        | 155        |
| <b>Model 8</b>                | 168                               | 7        | 1                 | 2        | 94.4                 | 3.9        | 0,6               | 1.1        | -8.38        | 149        |
| <b>Model 9</b>                | 170                               | 6        | 1                 | 1        | 95.5                 | 3.4        | 0,6               | 0.6        | -8.41        | 160        |
| <b>Model 10</b>               | <b>170</b>                        | <b>6</b> | <b>1</b>          | <b>1</b> | <b>95.5</b>          | <b>3.4</b> | <b>0,6</b>        | <b>0.6</b> | <b>-8.51</b> | <b>159</b> |
| Template:<br>3UNB_I<br>204 aa |                                   |          |                   |          |                      |            |                   |            | -8.26        | 153        |

### Subunit beta 5

| PROCHECK                          |                      |          |                   |          |                      |            |                   |          | PROSA web      | Hbplus        |
|-----------------------------------|----------------------|----------|-------------------|----------|----------------------|------------|-------------------|----------|----------------|---------------|
| Number of amino acids in regions: |                      |          |                   |          | Percentage           |            |                   |          |                |               |
|                                   | <i>Most favoured</i> |          | <i>Generously</i> |          | <i>Most favoured</i> |            | <i>Generously</i> |          | <i>Z-score</i> | <b>Hbonds</b> |
|                                   | <i>Additional</i>    |          | <i>Disallowed</i> |          | <i>Additional</i>    |            | <i>Disallowed</i> |          |                |               |
| <b>Model 1</b>                    | 168                  | 10       | 0                 | 0        | 94.4                 | 5.6        | 0                 | 0        | -6.18          | 167           |
| <b>Model 2</b>                    | 169                  | 9        | 0                 | 0        | 94.9                 | 5.1        | 0                 | 0        | -6.11          | 173           |
| <b>Model 3</b>                    | 169                  | 9        | 0                 | 0        | 94.9                 | 5.1        | 0                 | 0        | -6.22          | 169           |
| <b>Model 4</b>                    | 170                  | 8        | 0                 | 0        | 95.5                 | 4.5        | 0                 | 0        | -6.23          | 172           |
| <b>Model 5</b>                    | 170                  | 8        | 0                 | 0        | 95.5                 | 4.5        | 0                 | 0        | -6.42          | 165           |
| <b>Model 6</b>                    | <b>172</b>           | <b>6</b> | <b>0</b>          | <b>0</b> | <b>96.6</b>          | <b>3.4</b> | <b>0</b>          | <b>0</b> | <b>-6.45</b>   | <b>176</b>    |
| <b>Model 7</b>                    | 172                  | 6        | 0                 | 0        | 96.6                 | 3.4        | 0                 | 0        | -6.21          | 189           |
| <b>Model 8</b>                    | 172                  | 7        | 0                 | 0        | 96.1                 | 3.9        | 0                 | 0        | -6.27          | 165           |
| <b>Model 9</b>                    | 169                  | 9        | 0                 | 0        | 94.9                 | 5.1        | 0                 | 0        | -6.16          | 174           |
| <b>Model 10</b>                   | 170                  | 8        | 0                 | 0        | 95.5                 | 4.5        | 0                 | 0        | -6.22          | 166           |
| Template:<br>3UNB_K<br>205 aa     |                      |          |                   |          |                      |            |                   |          | -6.32          | 172           |



Drosophila melanogaster\_NP\_652031 --MQ-PDFD TD----- 20 40 60 ---TPVS-T GTTMAVEFD GGVI GADSR 34  
 Caenorhabditis elegans\_NP\_498806 MTSFTGITAV ANATNEMAMF KQAMKEVAAH PEWMSSRQIE RQRWNPYSME GGSTCAISGE NFAIVASDTR 70  
 Arabidopsis thaliana\_NP\_191641 ---MTKQH AN----- ---WSPYDNN GGTCVAIAGS DYCVAADTR 34  
 Xenopus laevis\_NP\_001080435 --M-SSESI LNRELNRSY ---DHYHTGPVE -QRFNPTFN GGTVLAVAGE DFAIVASDTR 54  
 Mus musculus\_NP\_035315 --ML-STAA Y RDVERELGM ----- GPHGSAGPVQ -LRFSPYAFN GGTVLAVAGE DFIIVASDTR 55  
 Homo sapiens\_NP\_002784 --MLSSTAMY SAPGRDLGM ----- EPHRAAGPLQ -LRFSPYAFN GGTVLAVAGE DFAIVASDTR 56  
 Danio rerio\_NP\_001003889 --ML-SAQA Y GENK---M ----- -HKFSPYAFN GGTVLAVAGE DFAIVASDTR 52  
 Oreochromis niloticus\_XP\_003454565 --ML-SSQHF GDPGK--M ----- KDYHYTGPVE -HKFSPYAFN GGTVLAVAGE DFAIVASDTR 52  
 Trematomus bernacchii --ML-SSQSY QDPGK--M ----- QDYHYSGPVE -HRFSPYSFN GGTVLAVAGE DFAIVASDTR 52  
 Notothenia coriiceps\_XP\_010781254 --ML-SSQSY QDPGK--M ----- KDYHYSGPVE -HRFSPYSFN GGTVLAVAGE DFAIVASDTR 52  
 Consensus --ML-SSQXY XDPGK--M----- KDYHYXGPVE -HRFSPYSFN GGTVLAVAGE DFAIVASDTR

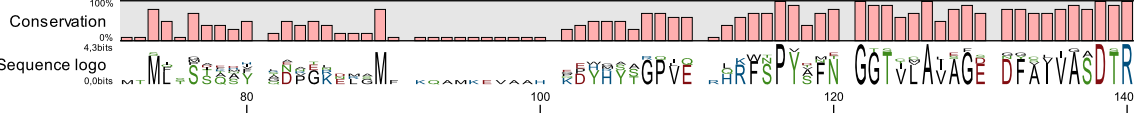

Drosophila melanogaster\_NP\_652031 TSSG-AYVAN RVTDKLTRIT DKVYCCRS GS AADTQAADJ VANSINYHEN QTNKDALVEE AASEFRNYCY 103  
 Caenorhabditis elegans\_NP\_498806 MTQNDINILT RDAEKIQILN DNIILTTS GF VGDVLOKKV LQSR LHKYRF DYRSDMSVD CAELSRNLY 140  
 Arabidopsis thaliana\_NP\_191641 MSTG-YSILS RDYSKTHKLA DRAVLSSSGF QADV KALQKV LKSRHLIQH QHNKQMSCPA MAQLLSNTLY 103  
 Xenopus laevis\_NP\_001080435 LSEG-YSIHS RNTPKCYKLT DKTVIGCTGF HADCLLTKI IEARLKMYKH SNNKTMTSGA IAAMLSTILY 123  
 Mus musculus\_NP\_035315 LSEG-FSIIH RDSPKCYKLT DKTVIGCSGF HGDCLLTKI IEARLKMYKH SNNKAMTTGA IAAMLSTILY 124  
 Homo sapiens\_NP\_002784 LSEG-FSIIH RDSPKCYKLT DKTVIGCSGF HGDCLLTKI IEARLKMYKH SNNKAMTTGA IAAMLSTILY 125  
 Danio rerio\_NP\_001003889 LSEG-YSIHS RDSPKCYKLT DTTVIGCSGF HGDCLLTKI IEARLKMYKH SNNKMTSGA IAAMLSTILY 121  
 Oreochromis niloticus\_XP\_003454565 LSEG-YSIHS RDSPKCYKLT DTTVIGCSGF HGDCLLTKI IEARLKMYKH SNNKTMTSGA IAAMLSTILY 121  
 Trematomus bernacchii LSEG-YSIHS RDSPKCYKLT DTTVIGCSGF HGDCLLTKI IEARLKMYKH SNNKTMTSNA IAAMLSTILY 121  
 Notothenia coriiceps\_XP\_010781254 LSEG-YSIHS RDSPKCYKLT DTTVIGCSGF HGDCLLTKI IEARLKMYKH SNNKTMTSNA IAAMLSTILY 121  
 Consensus LSEG-YSIHS RDSPKCYKLT DXTVIGCSGF HGDCLLTKI IEARLKMYKH SNNKTMTSGA IAAMLSTILY

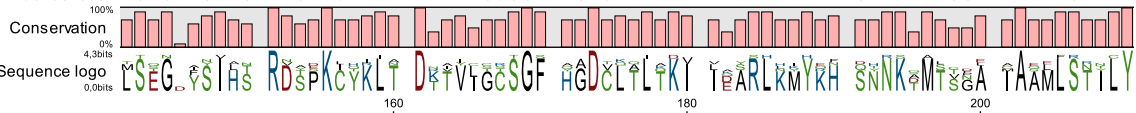

Drosophila melanogaster\_NP\_652031 SYR-ESLLAG LIVAGWDEQR GGQVYSIPLG GMLTRESCTI GSGSSSFIY G F-----VREHYR 159  
 Caenorhabditis elegans\_NP\_498806 YRRFFPYTYG AILAGIDEHG KGAVFSYDPI GCITERLGYSA SGAAPMIIIP FLDCQIGHVT ---LSEGYR 207  
 Arabidopsis thaliana\_NP\_191641 FKRFFPYTAF NVLGGDEEG KGCVFYDADF GSYERVYGA QSGSTLIMP FLDNQIKSPS PLLLPKODSN 173  
 Xenopus laevis\_NP\_001080435 SRRFFPYVYV NIIGLDEEG KGAVYSFDPV GSYQRDAYKA GGSASAMLQP FLDNQIGFKN ----MQNVEQ 189  
 Mus musculus\_NP\_035315 SRRFFPYVYV NIIGLDEEG KGAVYSFDPV GSYQRDSFKA GGSASAMLQP LLDNQIGFKN ----MQNVEH 190  
 Homo sapiens\_NP\_002784 SRRFFPYVYV NIIGLDEEG KGAVYSFDPV GSYQRDSFKA GGSASAMLQP LLDNQIGFKN ----MQNVEH 191  
 Danio rerio\_NP\_001003889 GRRFFPYVYV NIIGLDEEG RGAVYSFDPV GSYQRDTYKA GGSASAMLQP LLDNQIGFKN ----MENVEH 187  
 Oreochromis niloticus\_XP\_003454565 SRRFFPYVYV NIIGLDEEG KGAVYSFDPV GSYQRDTYKA GGSASAMLQP LLDNQIGFKN ----MEGVEH 187  
 Trematomus bernacchii GRRFFPYVYV NIIGLDEHG KGAVYSFDPV GSYQRDTYKA GGSASAMLQP LLDNQIGFKN ----MEGVQH 187  
 Notothenia coriiceps\_XP\_010781254 GRRFFPYVYV NIIGLDEHG KGAVYSFDPV GSYQRDTYKA GGSASAMLQP LLDNQIGFKN ----MEGVQH 187  
 Consensus SRRFFPYVYV NIIGLDEEG KGAVYSFDPV GSYQRDTYKA GGSASAMLQP LLDNQIGFKN ---MEXVEH

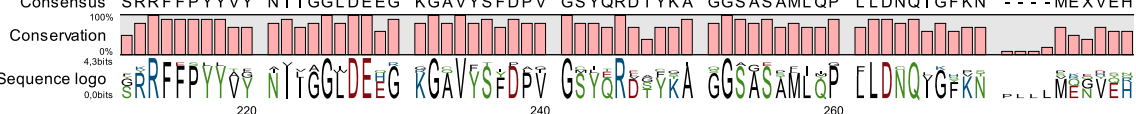

Drosophila melanogaster\_NP\_652031 PNMALEDCTI FVKKAVQHAL YHDGSSGGVY RIGII-TKD G IERRIFYNTE SGASAVSSTP SFIISSE 224  
 Caenorhabditis elegans\_NP\_498806 PELTDRALIS LMKDSFRGAA EREISTGDKI HLYIAEAGK P VVVK-----FLP --RED 258  
 Arabidopsis thaliana\_NP\_191641 TPSEAEAVD LVKTVFASAT ERDIYTGDKL EIMIL-KADG IKTE-----LMD --LRKD 223  
 Xenopus laevis\_NP\_001080435 LPLTLEKALK LKDVFI SAA ERDVYTGDA L HSIIV-TKD G VREE-----SIS --LRKD 239  
 Mus musculus\_NP\_035315 VPLTDRAMR LVKDVFI SAA ERDVYTGDA L RLCIV-TKE G IREE-----TVP --LRKD 240  
 Homo sapiens\_NP\_002784 VPLSADRMR LVKDVFI SAA ERDVYTGDA L RLCIV-TKE G IREE-----TVP --LRKD 241  
 Danio rerio\_NP\_001003889 VPLTQEKAMQ LVKDVFI SAA ERDVYTGDA L KVICIV-SKE G IREE-----TVP --LRKD 237  
 Oreochromis niloticus\_XP\_003454565 VPLTKDKAMQ LVKDVFI SAA ERDVYTGDA L RLCIV-TKE G INEE-----TVP --LRKD 237  
 Trematomus bernacchii VPLTQERAVQ LVKDVFI SAA ERDVYTGDA L RLCIV-TKE G INEQ-----TVP --LRKD 237  
 Notothenia coriiceps\_XP\_010781254 VPLSQRAMQ LVKDVFI SAA ERDVYTGDA L RLCIV-TKE G INEQ-----TVP --LRKD 237  
 Consensus VPLTLERAVQ LVKDVFI SAA ERDVYTGDA L RLCIV-TKE G IXEE-----TVP --LRKD

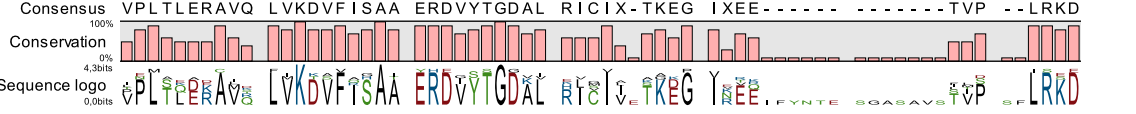

|                                    | 1  | 2     | 3     | 4     | 5     | 6     | 7     | 8     | 9     | 10    |
|------------------------------------|----|-------|-------|-------|-------|-------|-------|-------|-------|-------|
| Drosophila melanogaster_NP_652031  | 1  | 15,02 | 21,25 | 21,26 | 21,57 | 21,09 | 19,84 | 21,83 | 21,83 | 21,83 |
| Caenorhabditis elegans_NP_498806   | 2  | 41    | 35,25 | 36,82 | 37,98 | 36,43 | 37,21 | 37,21 | 38,76 | 38,37 |
| Arabidopsis thaliana_NP_191641     | 3  | 51    | 92    | 42,80 | 43,03 | 43,27 | 44,40 | 44,40 | 43,15 | 43,57 |
| Xenopus laevis_NP_001080435        | 4  | 54    | 95    | 104   | 78,33 | 77,18 | 79,17 | 80,42 | 78,75 | 78,33 |
| Mus musculus_NP_035315             | 5  | 55    | 98    | 105   | 188   | 93,36 | 81,67 | 82,50 | 81,67 | 80,83 |
| Homo sapiens_NP_002784             | 6  | 54    | 94    | 106   | 186   | 225   | 79,67 | 80,91 | 80,50 | 80,50 |
| Danio rerio_NP_001003889           | 7  | 50    | 96    | 107   | 190   | 196   | 192   | 90,72 | 88,61 | 88,19 |
| Oreochromis niloticus_XP_003454565 | 8  | 55    | 96    | 107   | 193   | 198   | 195   | 215   | 91,98 | 91,56 |
| Trematomus bernacchii              | 9  | 55    | 100   | 104   | 189   | 196   | 194   | 210   | 218   | 98,73 |
| Notothenia coriiceps_XP_010781254  | 10 | 55    | 99    | 105   | 188   | 194   | 194   | 209   | 217   | 234   |

**Figure S1. MUSCLE alignment of proteasome subunit beta 1 amino acid sequences, with species names and accession numbers.** The consensus sequence, the conservation histogram and the sequence logo are shown at the bottom of the alignment. The Table in the last page contains the pairwise comparison of the sequences, with the number of identities (below the diagonal) and percent identity (above the diagonal).

|                                    |            |            |            |             |            |            |            |    |
|------------------------------------|------------|------------|------------|-------------|------------|------------|------------|----|
| Caenorhabditis elegans_NP_493271   | MATADVKSTV | PHMDMDRGGG | EDFSNCLRNG | AMCKMGGKAP  | KLTSTGTTIV | AVAFKGGLVM | GADSRATAGN | 70 |
| Arabidopsis thaliana_NP_193216     | -----      | -----      | -----      | MECVFGLVGN  | GF-----    | -----      | ADTSAVHSI  | 25 |
| Drosophila melanogaster_NP_609804  | -----      | -----      | -----      | METLGLKGP   | DF-----    | -----      | AADTTHARS  | 25 |
| Homo sapiens_NP_002785             | -----      | -----      | -----      | MEYLVIGIQGP | DY-----    | -----      | ASDRVAASNI | 25 |
| Mus musculus_NP_036100             | -----      | -----      | -----      | MEYLVIGIQGP | DY-----    | -----      | ASDRVAASNI | 25 |
| Xenopus laevis_NP_001084761        | -----      | -----      | -----      | MEYLVIGIQGN | DF-----    | -----      | AADTYCANSI | 25 |
| Trematomus bernacchii              | -----      | -----      | -----      | MEYLVIGIQGP | NF-----    | -----      | AADNVAASSI | 25 |
| Notothenia coriiceps_XP_010789577  | -----      | -----      | -----      | MEYLVIGIQGP | DF-----    | -----      | AADNVAASSI | 25 |
| Danio rerio_NP_001002609           | -----      | -----      | -----      | MEYLVIGIQGP | DF-----    | -----      | AADNVAASSI | 25 |
| Oreochromis niloticus_XP_003447226 | -----      | -----      | -----      | MEYLVIGIQGP | DF-----    | -----      | AADNVAASSI | 25 |
| Consensus                          | -----      | -----      | -----      | MEYLVIGIQGP | DF-----    | -----      | AADNVAASSI |    |

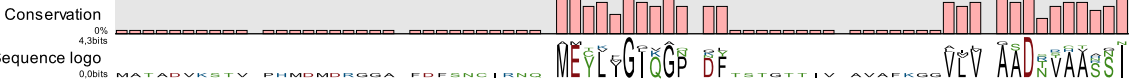

|                                    |            |            |            |            |            |            |            |     |
|------------------------------------|------------|------------|------------|------------|------------|------------|------------|-----|
| Caenorhabditis elegans_NP_493271   | IADKHCEKY  | HKLTESLYAC | GAGTAADLDQ | NTKMSGNLR  | LLELNTGRKA | RVITARQAK  | QHLFNQGYI  | 140 |
| Arabidopsis thaliana_NP_193216     | LHKNKEDKI  | MTLDSSHKLV | ASGEPGDRVQ | FTEYVOKNVS | LYQFRNGLP  | STAAAANFTR | GELATALR-K | 94  |
| Drosophila melanogaster_NP_609804  | IVMKEDQNKI | HKVSDSLLIS | TVGEGDTEQQ | FTEFISKNI  | LYKMRNGYDL | SPRESAHFTR | KNLAEYLRSS | 95  |
| Homo sapiens_NP_002785             | VQMKDDHDKM | FKMSEKILL  | CVGEGDITVQ | FAEYIQKNVQ | LYKMRNGYEL | SPTAAANFTR | RNLADCLRSS | 95  |
| Mus musculus_NP_036100             | VQMKDDHDKM | FKMSEKILL  | CVGEGDITVQ | FAEYIQKNVQ | LYKMRNGYEL | SPTAAANFTR | RNLADCLRSS | 95  |
| Xenopus laevis_NP_001084761        | IQMKHDQDKM | FKLSEKILL  | CVGEGDITVQ | FAEYIQKNVQ | LYKMRNGYEL | SPTAAANFTR | RNLADYLRSS | 95  |
| Trematomus bernacchii              | IQMKHDQDKM | FKLSEKILL  | CVGEGDITVQ | FAEYIQKNVQ | LYKMRNGYEL | SPSAAANFTR | RNLADYLRSS | 95  |
| Notothenia coriiceps_XP_010789577  | IQMKHDQDKM | FKLSEKILL  | CVGEGDITVQ | FAEYIQKNVQ | LYKMRNGYEL | SPSAAANFTR | RNLADYLRSS | 95  |
| Danio rerio_NP_001002609           | IQMKHDQDKM | FKLSEKILL  | CVGEGDITVQ | FAEYIQKNVQ | LYKMRNGYEL | SPSAAANFTR | RNLADYLRSS | 95  |
| Oreochromis niloticus_XP_003447226 | IQMKHDQDKM | FKLSEKILL  | CVGEGDITVQ | FAEYIQKNVQ | LYKMRNGYEL | SPAAAANFTR | RNLADYLRSS | 95  |
| Consensus                          | IQMKHDQDKM | FKLSEKILL  | CVGEGDITVQ | FAEYIQKNVQ | LYKMRNGYEL | SPXAAANFTR | RNLADYLRSS |     |

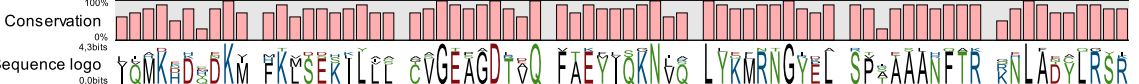

|                                    |             |            |            |            |             |            |            |     |
|------------------------------------|-------------|------------|------------|------------|-------------|------------|------------|-----|
| Caenorhabditis elegans_NP_493271   | GAYV--LILG  | GVDPTGPH   | YMCANGTMM  | AFPFTAQSG  | SYAATILER   | DFKVDMTKDE | AELVQRALE  | 206 |
| Arabidopsis thaliana_NP_193216     | NPYSVNILLMA | GYDKEAGASL | YYIDYATLH  | KVDKGAFIGY | SYFSLSTMDR  | HYRSDMSVEE | AIELVQKCL  | 164 |
| Drosophila melanogaster_NP_609804  | TPYQVFVFA   | GYDPNAGPEL | TFIDYLANA  | PNNYAGHG   | AEASSIYDR   | YWHPNITQAE | AYDVEKKCIA | 165 |
| Homo sapiens_NP_002785             | TPYHVNLLA   | GYDEHGPAAL | YYMDYAAAL  | KAPFAAHGY  | AFLLTSLILDR | YYTPTISRER | AVELLRKLE  | 165 |
| Mus musculus_NP_036100             | TPYHVNLLA   | GYDEHGPAAL | YYMDYAAAL  | KAPFAAHGY  | AFLLTSLILDR | YYTPTISRER | AVELLRKLE  | 165 |
| Xenopus laevis_NP_001084761        | TPYHVNLLA   | GYDEHAGPSS | YYMDYLSALA | KTFAAAHGY  | AYLLTSLILDR | YYKPDLTRED | AVELLRKCL  | 165 |
| Trematomus bernacchii              | TPYHVNLLA   | GYDETGGPGL | YYMDYSSLS  | KAPFAAHGY  | AFLLTSLILDR | HYKPDLTREE | AVDLLKCCIE | 165 |
| Notothenia coriiceps_XP_010789577  | TPYHVNLLA   | GYDETGGPGL | YYMDYSSLS  | KAPFAAHGY  | AYLLTSLILDR | HYKPDLTREE | AVDLLKCCIE | 165 |
| Danio rerio_NP_001002609           | TPYHVNLLA   | GYDETGGPGL | YYMDYLSALA | KAPFAAHGY  | AFLLTSLILDR | YYKPDLTREE | AVDLLKCCLE | 165 |
| Oreochromis niloticus_XP_003447226 | TPYHVNLLA   | GYDDTGGPGL | YYMDHSSLS  | KAPFAAHGY  | AYLLTSLILDR | YYRPPLSRDE | AVDLLKCCVE | 165 |
| Consensus                          | TPYHVNLLA   | GYDETGGPGL | YYMDYLSALA | KAPFAAHGY  | AYLLTSLILDR | YYKPDLTREE | AVDLLKCCIE |     |

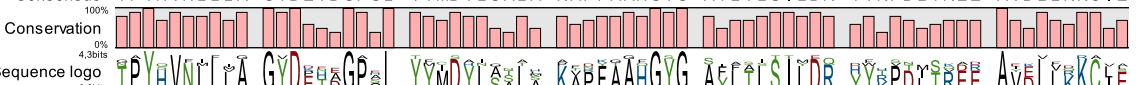

|                                    |            |            |            |            |             |            |            |     |
|------------------------------------|------------|------------|------------|------------|-------------|------------|------------|-----|
| Caenorhabditis elegans_NP_493271   | AGMHGDNASG | NSLNLVITEP | SETVFKGPIV | PEFCKRPEPN | DLVYKFAQGA  | TKVLKHKTYK | YDVVESMDIT | 276 |
| Arabidopsis thaliana_NP_193216     | E-----     | IRSRLVIAPP | NFVI-----  | -KLVDKDGAR | EYGWRISTAD  | A-----     | -----      | 199 |
| Drosophila melanogaster_NP_609804  | E-----     | IQKRFVNNLK | NFTV-----  | -AMVDKDGVR | DLE-PIISAAS | LAA-----   | -----      | 201 |
| Homo sapiens_NP_002785             | E-----     | LQKRFILNLP | TFSV-----  | -RLIDKNGIH | DLD-NISFPK  | QGS-----   | -----      | 201 |
| Mus musculus_NP_036100             | E-----     | LQKRFILNLP | TFSV-----  | -RVIDKDGIH | NLE-NIAFPK  | RDS-----   | -----      | 201 |
| Xenopus laevis_NP_001084761        | E-----     | LQKRFILNLP | SFTV-----  | -RVIDKDGIH | DLD-SIPASS  | I-----     | -----      | 199 |
| Trematomus bernacchii              | E-----     | LRKRFILNLP | SFTV-----  | -RLIDKEGTH | DLE-KLCSGA  | K-----     | -----      | 199 |
| Notothenia coriiceps_XP_010789577  | E-----     | LRKRFILNLP | SFTV-----  | -RLIDKEGTH | DLE-KLSSGA  | K-----     | -----      | 199 |
| Danio rerio_NP_001002609           | E-----     | LNRKFILNLP | SFTV-----  | -RLIDKDGTH | DME-KLPYGR  | K-----     | -----      | 199 |
| Oreochromis niloticus_XP_003447226 | E-----     | LKRRFILNLP | SFTV-----  | -RLIDKEGTH | DLE-KLTLGA  | K-----     | -----      | 199 |
| Consensus                          | E-----     | LQKRFILNLP | SFTV-----  | -RLIDKDGTH | DLE-KISAGA  | K-----     | -----      |     |

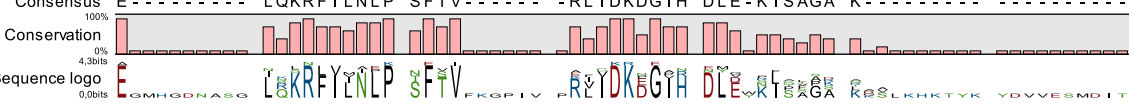

- Caenorhabditis elegans\_NP\_493271 H 277
- Arabidopsis thaliana\_NP\_193216 - 199
- Drosophila melanogaster\_NP\_609804 - 201
- Homo sapiens\_NP\_002785 - 201
- Mus musculus\_NP\_036100 - 201
- Xenopus laevis\_NP\_001084761 - 199
- Trematomus bernacchii - 199
- Notothenia coriiceps\_XP\_010789577 - 199
- Danio rerio\_NP\_001002609 - 199
- Oreochromis niloticus\_XP\_003447226 - 199
- Consensus -
- Conservation 100%
- 0%
- 4.3bits
- Sequence logo 0.0bits

|                                    | 1  | 2     | 3     | 4     | 5     | 6     | 7     | 8     | 9     | 10    |
|------------------------------------|----|-------|-------|-------|-------|-------|-------|-------|-------|-------|
| Caenorhabditis elegans_NP_493271   | 1  | 14,23 | 14,95 | 14,95 | 14,59 | 16,73 | 19,22 | 19,93 | 18,86 | 19,22 |
| Arabidopsis thaliana_NP_193216     | 2  | 40    | 41,09 | 43,56 | 43,07 | 47,00 | 44,50 | 45,00 | 45,50 | 45,00 |
| Drosophila melanogaster_NP_609804  | 3  | 42    | 83    | 49,75 | 50,25 | 55,72 | 52,24 | 53,73 | 53,23 | 51,74 |
| Homo sapiens_NP_002785             | 4  | 42    | 88    | 100   | 96,52 | 81,59 | 77,11 | 77,11 | 81,09 | 78,61 |
| Mus musculus_NP_036100             | 5  | 41    | 87    | 101   | 194   | 81,59 | 77,11 | 76,62 | 81,59 | 78,61 |
| Xenopus laevis_NP_001084761        | 6  | 47    | 94    | 112   | 164   | 164   | 81,41 | 82,41 | 85,43 | 82,91 |
| Trematomus bernacchii              | 7  | 54    | 89    | 105   | 155   | 155   | 162   | 97,49 | 90,45 | 89,45 |
| Notothenia coriiceps_XP_010789577  | 8  | 56    | 90    | 108   | 155   | 154   | 164   | 194   | 90,45 | 90,45 |
| Danio rerio_NP_001002609           | 9  | 53    | 91    | 107   | 163   | 164   | 170   | 180   | 180   | 92,96 |
| Oreochromis niloticus_XP_003447226 | 10 | 54    | 90    | 104   | 158   | 158   | 165   | 178   | 180   | 185   |

**Figure S2. MUSCLE alignment of proteasome subunit beta 2 amino acid sequences, with species names and accession numbers.** The consensus sequence, the conservation histogram and the sequence logo are shown at the bottom of the alignment. The Table in the last page contains the pairwise comparison of the sequences, with the number of identities (below the diagonal) and percent identity (above the diagonal).

Caenorhabditis elegans\_NP\_494913 MS MSYTG GT VVAMAGDECY CIAASDLRI GE QMTTIA TDQK KVHKVTDK VY VGLAG EQSDA RTVLEKIMFR 70  
 Arabidopsis thaliana\_NP\_565156 MS FEYNGSA VVAMGKNCV AIASDRRLGV QLTIA TD FQ RISK HDH LF IGLSG IATDV QTLYQR LVFR 70  
 Drosophila melanogaster\_NP\_649858 MS LAYNGGC VVAMRGKDCV AIA TDH RFG QAQT I STDFK KV FH IGPRMF IGLTG QTDI LTVRDR LMFR 70  
 Homo sapiens\_NP\_002786 MS MSYNGGA VMAMGKNCV AIAADR RFGI QAQMVT TDFQ KIFPMGDR LY IGLAG IATDV QTVAQR LKFR 70  
 Mus musculus\_NP\_036101 MS MSYNGGA VMAMGKNCV AIAADR RFGI QAQMVT TDFQ KIFPMGDR LY IGLAG IATDV QTVAQR LKFR 70  
 Xenopus laevis\_NP\_001088741 MS MSYNGGA VMAMGKDCV AIAADR RFGI QAQMVT TDFQ KIFPMGER LY IGLAG IATDV QTVAQR LKFR 70  
 Danio rerio\_NP\_001123295 MS MSYNGGA VMAMRGKNCV AIAADR RFGI QAQLVTTDFQ KIFPMGER LY IGLAG IATDV QTVSQR LKFR 70  
 Trematodus bernacchii MS MSYNGGA VMAMRGKNCV AIAADR RFGI QAQMVT TDFQ KIFPMGDR LY IGLAG IATDV QTVAQR LKFR 70  
 Oreochromis niloticus\_XP\_003448021 MS MSYNGGA VMAMRGKNCV AIAADR RFGI QAQMVT TDFQ KIFPMGDR LY IGLAG IATDV QTVAQR LKFR 70

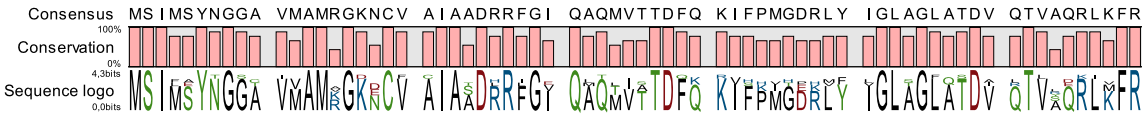

Caenorhabditis elegans\_NP\_494913 KNLYELRENR NIKPQVLSM ISNLAYQHRF GSYFTEP LVA GLD -DTNKPY ICCMDT I GCV SAPRDF VAVG 139  
 Arabidopsis thaliana\_NP\_565156 HKLYQLREER DMKPE T FASL VSAILYKRF GPFLCQPVIA GLG -DDNKPF ICTMBS GAK ELAKDF VVSG 139  
 Drosophila melanogaster\_NP\_649858 KNLYETRENR EMCPK PFSAM MSSFLYEHRF GPYFTEP VVA GLD PKTME PF ICNMDL I GCP NAPDDF VVAG 140  
 Homo sapiens\_NP\_002786 LNLYELKEGR QIKP Y T LMSM VANLLYKRF GPYYTEP VIA GLD PKT FKP F ICSDL I GCP MVTDDF VVSG 140  
 Mus musculus\_NP\_036101 LNLYELKEGR QIKP Y T LMSM VANLLYKRF GPYYTEP VIA GLD PKT FKP F ICSDL I GCP MVTDDF VVSG 140  
 Xenopus laevis\_NP\_001088741 LNLYELKEGR QIKP K T FMSM VANLLYERRF GPYYTEP VIA GLD PKT FQPF ICSDL I GCP METEDF VVSG 140  
 Danio rerio\_NP\_001123295 LNLYELKEGR QIKP R T FMSM VS NLLYERRF GPYYTEP VIA GLD PKT FEP F ICSDL I GCP MVTEDF VVSG 140  
 Trematodus bernacchii LNLYELKEGR QIKP K T FMSM VS NLLYKRF GPYYTEP VIA GLD PKTSEPF ICSDL I GCP MVTEDF VVSG 140  
 Oreochromis niloticus\_XP\_003448021 LNLYELKEGR QIKP K T FMSM VS NLLYERRF GPYYTEP VIA GLD PKT FEP F ICSDL I GCP MVTDDF VVSG 140

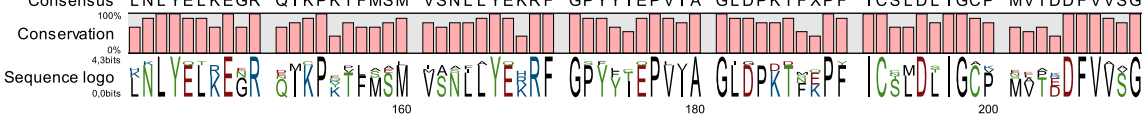

Caenorhabditis elegans\_NP\_494913 TGOEYLLGVC ENFWR ENMKP DELFEATQS LLSCLERDAA SGWGA VVY T TKDK NVSTI KARMD 204  
 Arabidopsis thaliana\_NP\_565156 TASESLYGAC EAMFKPDMEA EELFETISQA LLSVDRDCL SGWGGHVYV TPKEVKERI KGRMD 204  
 Drosophila melanogaster\_NP\_649858 TC AEQLY GMC ETLWKPDLEP DQLFETISQA IYNAFDRDAM SGWGATVY I EKDK I TERTL KTRMD 205  
 Homo sapiens\_NP\_002786 TC AEQMY GMC ESLWEPNDMP DHLFETISQA MLNAVDRDAV SGMGVVHV I EKDK I TTRTL KARMD 205  
 Mus musculus\_NP\_036101 TCSEQMY GMC ESLWEPNDMP EHLFETISQA MLNAVDRDAV SGMGVVHV I EKDK I TTRTL KARMD 205  
 Xenopus laevis\_NP\_001088741 TCSEQMY GMC ESLWEPDMEP EDLFETISQA MLNAVDRDAV SGMGVVHV I EKDK I TTRTL KARMD 205  
 Danio rerio\_NP\_001123295 TCSEQMY GMC ESLWEPDMP EDLFETISQA MLNAVDRDAV SGMGVVHV I EKDK I TTRTL KARMD 205  
 Trematodus bernacchii TCSEQMY GMC ESLWEPDMEP EDLFETISQA MLNAVDRDAV SGMGVVHV I EKDK I TTRTL KARMD 205  
 Oreochromis niloticus\_XP\_003448021 TCSEQMY GMC ESLWEPDMEP EDLFETISQA MLNAVDRDAV SGMGVVHV I EKDK I TTRTL KARMD 205

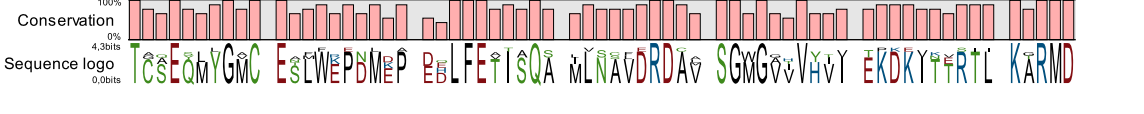

|                                    | 1 | 2     | 3     | 4     | 5     | 6     | 7     | 8     | 9     |
|------------------------------------|---|-------|-------|-------|-------|-------|-------|-------|-------|
| Caenorhabditis elegans_NP_494913   | 1 | 44,61 | 55,12 | 51,22 | 50,73 | 48,29 | 50,73 | 49,76 | 49,76 |
| Arabidopsis thaliana_NP_565156     | 2 | 91    | 51,22 | 56,10 | 57,56 | 57,07 | 57,56 | 58,54 | 58,54 |
| Drosophila melanogaster_NP_649858  | 3 | 113   | 105   | 63,90 | 62,44 | 63,90 | 64,88 | 64,88 | 66,34 |
| Homo sapiens_NP_002786             | 4 | 105   | 115   | 131   | 98,54 | 91,22 | 90,24 | 91,22 | 93,17 |
| Mus musculus_NP_036101             | 5 | 104   | 118   | 128   | 202   | 92,68 | 91,71 | 92,68 | 93,66 |
| Xenopus laevis_NP_001088741        | 6 | 99    | 117   | 131   | 187   | 190   | 94,15 | 93,66 | 94,63 |
| Danio rerio_NP_001123295           | 7 | 104   | 118   | 133   | 185   | 188   | 193   | 95,12 | 95,12 |
| Trematomus bernacchii              | 8 | 102   | 120   | 133   | 187   | 190   | 192   | 195   | 96,10 |
| Oreochromis niloticus_XP_003448021 | 9 | 102   | 120   | 136   | 191   | 192   | 194   | 195   | 197   |

**Figure S3. MUSCLE alignment of proteasome subunit beta 3 amino acid sequences, with species names and accession numbers.** The consensus sequence, the conservation histogram and the sequence logo are shown at the bottom of the alignment. The Table in the last page contains the pairwise comparison of the sequences, with the number of identities (below the diagonal) and percent identity (above the diagonal).

Caenorhabditis elegans\_NP\_493558 - MWGETFDDF ENDEGEMAMA KQNLI A EPA RAD FTFA - - - - - KLP L G QPVD F M K T - H FAETAGKSMQ 60  
 Drosophila melanogaster\_NP\_652014 MA LAE I C K I S N A P Y M R P N A W S S A D Y E E E Q K G L M C N L A N P Y T L A A P P F E N P L H N L N Q I Q A N G D K T G W K I N 69  
 Arabidopsis thaliana\_NP\_172765 M K L - - - - D T S G F E T S M P M I - - - - - G F G S S S D M - D - - - - E L S S Y P S F D P - - - R T K E F D G F Q K K A K D M L K 53  
 Xenopus laevis\_NP\_001084323 M A L L T M C G P T Q S H D W R M P L - - - - - Y G G T I S P T I P F R V C N T E L A M P P G Y Q P A - - K F L Q H - L E E G V D D V K I E 62  
 Mus musculus\_NP\_035316 M A L A S V L - - - - - Q R P M P V N O H G F F G I G G G A D L - D L G P G S P G D G L S L A A P - - - - - S W G V P E E P R I E 55  
 Homo sapiens\_NP\_002788 M A L A S V L - - - - - E R L P L Y N Q R G F F G I G G R A D L - D L G P G S L S D G L S L A A P - - - - - G W G V P E E P G I E 55  
 Danio rerio\_NP\_571226 M A L S S L L - R N E S A D R S D P I D R S F A H G G L N Q T N - G F G - A A L G D S P N F A V K - T - - - - G E D D E P E R K I E 61  
 Oreochromis niloticus\_XP\_003457456 M A L A S V L - S G D S A D F S F D S S Q S F A F G G G P G S G - L G F D - G T P G D G L S F S V K - - N P L C A - G D D D G V E R K I E 64  
 Trematomus bernacchii M A L A S V L - S S D C A K F S F D N C E P D S F G C A P G Q S G - L G F D - A T P G D G L S F S V R - - N P L C A - V E E D G V E R K I E 64  
 Notothenia coriiceps\_XP\_010781265 M A L A S V L - S S D C A K F S F D N C E P D S F G C A P G Q S G - L G F D - A T P G D G L S F S V R - - N P L C A - V E E D G V E R K I E 64

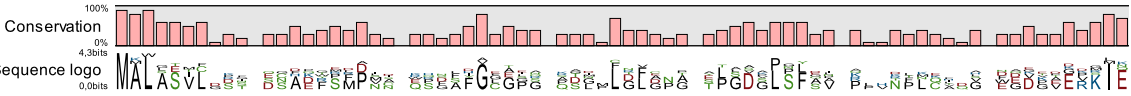

Caenorhabditis elegans\_NP\_493558 FRKGTTLAF VYEPATPADK GGIVAVDSR ASSGEYISSK SVMKILDGD RMYATMAGGA ADCQWTRIV 130  
 Drosophila melanogaster\_NP\_652014 FDHGTTLGF KFPATPADK GGIVAVDSR ATGGSYISQ SMKIVEVNG FMLGTMAGGA ADCVYVDRVL 132  
 Arabidopsis thaliana\_NP\_172765 HAKGTTLAF LF-----K GGVMVAADSR ASMGGYISSQ SVKVIENP YMLGTMAGGA ADCQVWHRNL 116  
 Xenopus laevis\_NP\_001084323 PWHGTTLAF KF-----Q HGVI VAVDSR ASAGSYSTI KFNKVIENP YLLGTMSSA ADCQYWERLL 125  
 Mus musculus\_NP\_035316 M L H G T T T L A F K F ----- L H G V I V A A D S R A T A G A Y I A S Q T V K K V I E I N P Y L L G T M A G G A A D C S F W E R L L 118  
 Homo sapiens\_NP\_002788 M L H G T T T L A F K F ----- R H G V I V A A D S R A T A G A Y I A S Q T V K K V I E I N P Y L L G T M A G G A A D C S F W E R L L 118  
 Danio rerio\_NP\_571226 F L H G T T T L A F K F ----- Q H G V I V A A D S R A T A G A Y I A S Q T V K K V I E I N P Y L L G T M A G G A A D C S F W E R L L 124  
 Oreochromis niloticus\_XP\_003457456 F L H G T T T L A F K F ----- Q H G V I V A A D S R A T A G A Y I A S Q T V K K V I E I N P Y L L G T M A G G A A D C S F W E R L L 127  
 Trematomus bernacchii F L H G T T T L A F K F ----- Q H G V I V A A D S R A T A G A Y I A S Q T V K K V I E I N P Y L L G T M A G G A A D C S F W E R L L 127  
 Notothenia coriiceps\_XP\_010781265 F L H G T T T L A F K F ----- Q H G V I V A A D S R A T A G A Y I A S Q T V K K V I E I N P Y L L G T M A G G A A D C S F W E R L L 127

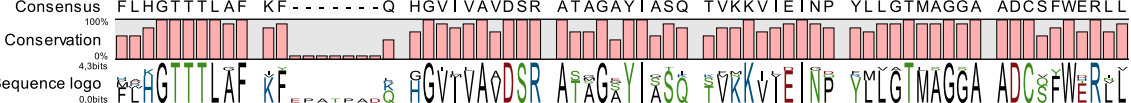

Caenorhabditis elegans\_NP\_493558 AKYCTLYELR E K T S I T V S A A S K Y F A N T L Y G Y R G Q G L S V G S M V A G Y D K K G P Q I F K V D S E G D R C Q L K V C S V G 200  
 Drosophila melanogaster\_NP\_652014 S K E C R L H E L R N K E R I S V A A A S K I M A N L A H E Y K G M G L S M G M M L A G Y D K R G P G L Y Y D S E G S R T P G N L F S V G 202  
 Arabidopsis thaliana\_NP\_172765 G L K R L H E L A N K R R I S V S G A S K L L A N M L Y S Y R G M G L S M G T M I A G W D E T G P G L Y Y D S E G G R L K G D R F S V G 186  
 Xenopus laevis\_NP\_001084323 A K E C R L Y Q L R N N S R I S V S A A S K L M C N M L Q Y R G T G L S V G S M I C G W D K K G P G L Y Y D D N G T R L C G D I F S T G 195  
 Mus musculus\_NP\_035316 A R Q C R I Y E L R N K E R I S V A A A S K L L A N M V Y Q Y K G M G L S M G T M I C G W D K R G P G L Y Y D S E G N R I S G T A F S V G 188  
 Homo sapiens\_NP\_002788 A R Q C R I Y E L R N K E R I S V A A A S K L L A N M V Y Q Y K G M G L S M G T M I C G W D K R G P G L Y Y D S E G N R I S G A T F S V G 188  
 Danio rerio\_NP\_571226 A R Q C R I Y E L R N K E R I S V A A A S K L L A N M V Y Q Y K G M G L S M G T M V C G W D K R G P G L Y Y D S E G N R V C G D L F A V G 194  
 Oreochromis niloticus\_XP\_003457456 A R Q C R I Y E L R N K E R I S V A A A S K L L A N M V Y Q Y K G M G L S M G T M V C G W D K R G P G L Y Y D S E G N R V C G D L F A V G 197  
 Trematomus bernacchii A R Q C R I Y E L R N K E R I S V A A A S K L L A N M V Y Q Y K G M G L S M G T M V C G W D K R G P G L Y Y D S E G N R V C G D L F A V G 197  
 Notothenia coriiceps\_XP\_010781265 A R Q C R I Y E L R N K E R I S V A A A S K L L A N M V Y Q Y K G M G L S M G T M V C G W D K R G P G L Y Y D S E G N R V C G D L F A V G 197

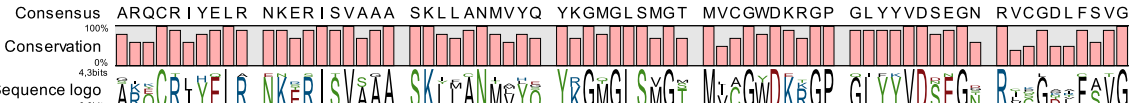

Caenorhabditis elegans\_NP\_493558 S G S L N A Y G V L D N H Y K P K M T D D E A R K L G L R A M H A T Y R D S G S G G V C N L C H I T P T E K I R L P P M D V S K L W Y E F 270  
 Drosophila melanogaster\_NP\_652014 S G S Y A Y G V L D S G Y H W D L E D K E A Q E L G R R A Y H A T F R D G A S G G I R V Y H I K E D G W N I S N T D C M E L H Y M Y 272  
 Arabidopsis thaliana\_NP\_172765 S G S P Y A Y G V L D S G Y K Y D M S V E E A S E L A R R S Y H A T F R D G A S G G M A S V Y H I G P E G W T K L S G D D V G E L H Y M Y 256  
 Xenopus laevis\_NP\_001084323 S G N S Y A Y G V M D S G Y R F D L T P E E A Y D L G R R A I Y A T H R D A Y S G G C V N L Y H M K E D G W V K I G Q F D V S D L L H K F 265  
 Mus musculus\_NP\_035316 S G S Y A Y G V M D R G Y S Y D L K V E E A Y D L A R R A Y Q A T Y R D A Y S G G A N L Y H V R E D G W I R V S S D N V A D L H D K Y 258  
 Homo sapiens\_NP\_002788 S G S Y A Y G V M D R G Y S Y D L E V E E A Y D L A R R A Y Q A T Y R D A Y S G G A N L Y H V R E D G W I R V S S D N V A D L H E K Y 258  
 Danio rerio\_NP\_571226 S G S M Y A Y G V M D S G L R H D L T I D E A C E L G R R A Y Q A T Y R D A Y S G G Q V N L Y R V H S E G W E R V S Q E D V L Q L H Q Q Y 264  
 Oreochromis niloticus\_XP\_003457456 S G S M Y A Y G V M D S G V R H D L T V E E A C E L G R R A Y Q A T Y R D A Y S G G Q V N L Y H V H S E G W T R I S Q D D V L V L H H Q Y 267  
 Trematomus bernacchii S G S M Y A Y G V I D S G L R Q D L T V E E A C E L G R R A Y Q A T Y R D A Y S G G Q V N L Y H V H S E G W T R V S Q E D V L V L H H Q Y 267  
 Notothenia coriiceps\_XP\_010781265 S G S M Y A Y G V I D S G L R Q D L T V E E A C E L G R R A Y Q A T Y R D A Y S G G Q V N L Y H V H S E G W T R V S Q E D V L M L H Q Q Y 267

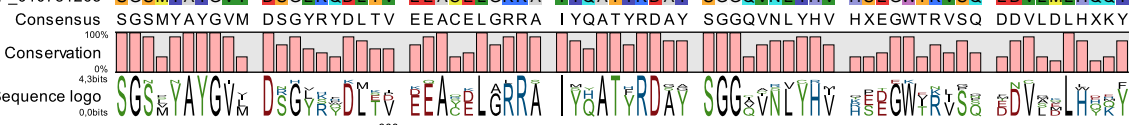

Caenorhabditis elegans\_NP\_493558 - - - - - A D E L G R D I T Y N P V E 284  
 Drosophila melanogaster\_NP\_652014 - - - - - Q E Q L K Q Q A A K - - - - - 282  
 Arabidopsis thaliana\_NP\_172765 Y P M A P A T A E Q V M E E A T A E - - - - - 274  
 Xenopus laevis\_NP\_001084323 - - - - - T E E K N M - - - - - 271  
 Mus musculus\_NP\_035316 - - - - - S S S V P - - - - - 264  
 Homo sapiens\_NP\_002788 - - - - - S G S T P - - - - - 263  
 Danio rerio\_NP\_571226 - - - - - Q S E K A - - - - - 269  
 Oreochromis niloticus\_XP\_003457456 - - - - - K D Q A - - - - - 271  
 Trematomus bernacchii - - - - - K S Q A - - - - - 271  
 Notothenia coriiceps\_XP\_010781265 - - - - - K S Q A - - - - - 271

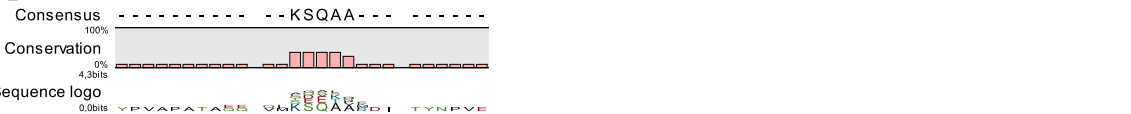

|                                    | 1  | 2     | 3     | 4     | 5     | 6     | 7     | 8     | 9     | 10    |
|------------------------------------|----|-------|-------|-------|-------|-------|-------|-------|-------|-------|
| Caenorhabditis elegans_NP_493558   | 1  | 37,25 | 38,61 | 35,49 | 35,27 | 34,93 | 36,43 | 36,43 | 36,43 | 36,43 |
| Drosophila melanogaster_NP_652014  | 2  | 111   | 47,59 | 46,29 | 49,65 | 49,65 | 51,42 | 53,55 | 52,13 | 52,13 |
| Arabidopsis thaliana_NP_172765     | 3  | 117   | 138   | 45,96 | 50,87 | 51,92 | 49,30 | 50,35 | 49,30 | 49,30 |
| Xenopus laevis_NP_001084323        | 4  | 104   | 131   | 131   | 52,90 | 52,54 | 55,43 | 55,80 | 53,62 | 53,26 |
| Mus musculus_NP_035316             | 5  | 103   | 140   | 146   | 146   | 92,80 | 69,74 | 71,17 | 70,44 | 70,44 |
| Homo sapiens_NP_002788             | 6  | 102   | 140   | 149   | 145   | 245   | 69,63 | 70,33 | 68,86 | 68,86 |
| Danio rerio_NP_571226              | 7  | 106   | 145   | 141   | 153   | 189   | 188   | 80,51 | 80,88 | 80,51 |
| Oreochromis niloticus_XP_003457456 | 8  | 106   | 151   | 144   | 154   | 195   | 192   | 219   | 88,93 | 89,30 |
| Trematomus bernacchii              | 9  | 106   | 147   | 141   | 148   | 193   | 188   | 220   | 241   | 99,63 |
| Notothenia coriiceps_XP_010781265  | 10 | 106   | 147   | 141   | 147   | 193   | 188   | 219   | 242   | 270   |

**Figure S4. MUSCLE alignment of proteasome subunit beta 5 amino acid sequences, with species names and accession numbers.** The consensus sequence, the conservation histogram and the sequence logo are shown at the bottom of the alignment. The Table in the last page contains the pairwise comparison of the sequences, with the number of identities (below the diagonal) and percent identity (above the diagonal).



Drosophila melanogaster\_NP\_651843  
 Arabidopsis thaliana\_NP\_188850  
 Caenorhabditis elegans\_NP\_491520  
 Xenopus laevis\_NP\_001089811  
 Mus musculus\_NP\_036096  
 Homo sapiens\_NP\_002780  
 Notothenia coriiceps\_XP\_010770288  
 Trematomus bernacchii  
 Oreochromis niloticus\_XP\_003450834  
 Danio rerio\_NP\_999862

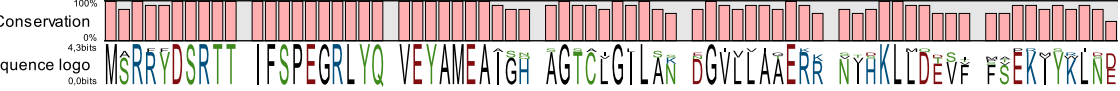

Drosophila melanogaster\_NP\_651843  
 Arabidopsis thaliana\_NP\_188850  
 Caenorhabditis elegans\_NP\_491520  
 Xenopus laevis\_NP\_001089811  
 Mus musculus\_NP\_036096  
 Homo sapiens\_NP\_002780  
 Notothenia coriiceps\_XP\_010770288  
 Trematomus bernacchii  
 Oreochromis niloticus\_XP\_003450834  
 Danio rerio\_NP\_999862

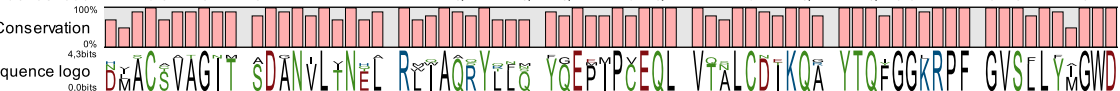

Drosophila melanogaster\_NP\_651843  
 Arabidopsis thaliana\_NP\_188850  
 Caenorhabditis elegans\_NP\_491520  
 Xenopus laevis\_NP\_001089811  
 Mus musculus\_NP\_036096  
 Homo sapiens\_NP\_002780  
 Notothenia coriiceps\_XP\_010770288  
 Trematomus bernacchii  
 Oreochromis niloticus\_XP\_003450834  
 Danio rerio\_NP\_999862

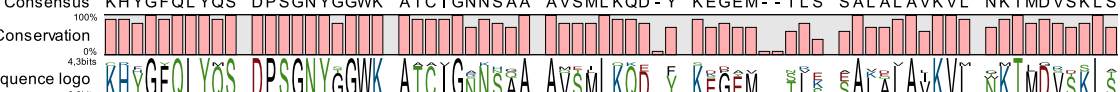

Drosophila melanogaster\_NP\_651843  
 Arabidopsis thaliana\_NP\_188850  
 Caenorhabditis elegans\_NP\_491520  
 Xenopus laevis\_NP\_001089811  
 Mus musculus\_NP\_036096  
 Homo sapiens\_NP\_002780  
 Notothenia coriiceps\_XP\_010770288  
 Trematomus bernacchii  
 Oreochromis niloticus\_XP\_003450834  
 Danio rerio\_NP\_999862

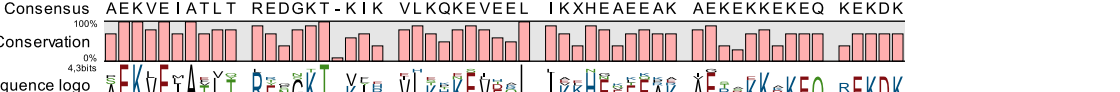

|                                    | 1  | 2     | 3     | 4     | 5     | 6     | 7     | 8     | 9     | 10    |
|------------------------------------|----|-------|-------|-------|-------|-------|-------|-------|-------|-------|
| Drosophila melanogaster_NP_651843  | 1  | 44,88 | 50,78 | 50,76 | 51,89 | 52,27 | 52,65 | 52,65 | 52,27 | 51,89 |
| Arabidopsis thaliana_NP_188850     | 2  | 114   | 55,34 | 56,49 | 56,11 | 56,11 | 55,73 | 55,73 | 56,11 | 56,49 |
| Caenorhabditis elegans_NP_491520   | 3  | 130   | 140   | 62,84 | 63,22 | 63,60 | 62,84 | 63,22 | 62,84 | 62,45 |
| Xenopus laevis_NP_001089811        | 4  | 134   | 148   | 164   | 96,55 | 96,93 | 93,87 | 93,49 | 95,40 | 95,40 |
| Mus musculus_NP_036096             | 5  | 137   | 147   | 165   | 252   | 98,85 | 93,87 | 93,49 | 95,79 | 95,79 |
| Homo sapiens_NP_002780             | 6  | 138   | 147   | 166   | 253   | 258   | 93,10 | 92,72 | 95,79 | 96,17 |
| Notothenia coriiceps_XP_010770288  | 7  | 139   | 146   | 164   | 245   | 245   | 243   | 99,62 | 96,93 | 95,79 |
| Trematomus bernacchii              | 8  | 139   | 146   | 165   | 244   | 244   | 242   | 260   | 96,55 | 95,40 |
| Oreochromis niloticus_XP_003450834 | 9  | 138   | 147   | 164   | 249   | 250   | 250   | 253   | 252   | 98,85 |
| Danio rerio_NP_999862              | 10 | 137   | 148   | 163   | 249   | 250   | 251   | 250   | 249   | 258   |

**Figure S5. MUSCLE alignment of proteasome subunit alpha 4 amino acid sequences, with species names and accession numbers.** The consensus sequence, the conservation histogram and the sequence logo are shown at the bottom of the alignment. The Table in the last page contains the pairwise comparison of the sequences, with the number of identities (below the diagonal) and percent identity (above the diagonal).

Caenorhabditis elegans\_NP\_492765 MFLTRSEYDR GVNTFSPEGR LFQVEYAIEA VKLGSTSGI KTSEGVLLAA EKRSTSKLMV NDAIEKISKV 70  
 Arabidopsis thaliana\_NP\_188046 MFLTRTEYDR GVNTFSPEGR LFQVEYAIEA KLGSTAGV KTKEGVVLA EKRITSPLE PSSVEKIMEI 70  
 Drosophila melanogaster\_NP\_725669 MFLTRSEYDR GVNTFSPEGR LFQVEYAIEA KLGSTAGV CTPGVLAV EKRITSPLMV PSTVEKIVEI 70  
 Mus musculus\_NP\_036097 MFLTRSEYDR GVNTFSPEGR LFQVEYAIEA KLGSTAGV QTSEGVCLAV EKRITSPLME PSSIEKIVEI 70  
 Homo sapiens\_NP\_002781 MFLTRSEYDR GVNTFSPEGR LFQVEYAIEA KLGSTAGV QTSEGVCLAV EKRITSPLME PSSIEKIVEI 70  
 Xenopus laevis\_BAD42871 MFLTRSEYDR GVNTFSPEGR LFQVEYAIEA KLGSTAGV QTSEGVCLAV EKRITSPLME PSSIEKIVEI 70  
 Trematodus bernacchii MFLTRSEYDR GVNTFSPEGR LFQVEYAIEA KLGSTAGV QTSEGVCLAV EKRITSPLME PMSIEKIVEI 70  
 Notothenia coriiceps\_XP\_01076620 MFLTRSEYDR GVNTFSPEGR LFQVEYAIEA KLGSTAGV QTSEGVCLAV EKRITSPLME PMSIEKIVEI 70  
 Danio rerio\_NP\_991271 MFLTRSEYDR GVNTFSPEGR LFQVEYAIEA KLGSTAGV QTSEGVCLAV EKRITSPLME PSSIEKIVEI 70  
 Oreochromis niloticus\_XP\_003441568 MFLTRSEYDR GVNTFSPEGR LFQVEYAIEA KLGSTAGV QTSEGVCLAV EKRITSPLME PSSIEKIVEI 70

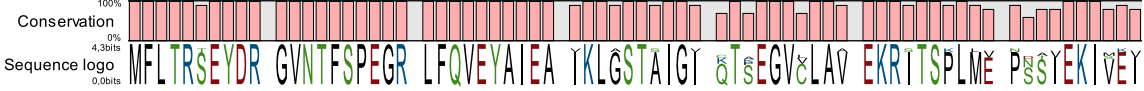

Caenorhabditis elegans\_NP\_492765 DQHIGVTFAG LIADARTLVE RAQIEAQNFW FTYNRKIRVE DYTQSVANLA LQFGDDVKA ---SMSRPF 137  
 Arabidopsis thaliana\_NP\_188046 DDHIGCAMS G LIADARTLVE HARVEQNHW FSYGEPMTVE STTQALCDLA LRFGEFEE - ---SMSRPF 136  
 Drosophila melanogaster\_NP\_725669 DKHIGCATSG LMADARTLIE RARVEQNHW FYNERMSIE SCQAVSTEA LQFGSDSD GAAAMS RPF 140  
 Mus musculus\_NP\_036097 DAHIGCAMS G LIADAKTLID KARVETQNHW FTYNETMTVE SVTQAVSNLA LQFG EEDADP G - AMSRPF 138  
 Homo sapiens\_NP\_002781 DAHIGCAMS G LIADAKTLID KARVETQNHW FTYNETMTVE SVTQAVSNLA LQFG EEDADP G - AMSRPF 138  
 Xenopus laevis\_BAD42871 DAHIGCAMS G LIADAKTLID KARVETQNHW FTYNETMTVE SVTQAVSNLA LQFG EEDADP G - AMSRPF 138  
 Trematodus bernacchii DAHIGCAMS G LIADAKTLID KARVETQNHW FTYNETMTVE SVTQAVSNLA LQFG EEDADP G - AMSRPF 138  
 Notothenia coriiceps\_XP\_01076620 DTHIGCAMS G LIADAKTLID KARVETQNHW FTYNETMTVE SVTQAVSNLA LQFG EEDADP G - AMSRPF 138  
 Danio rerio\_NP\_991271 DSHIGCAMS G LIADAKTLID KARVETQNHW FTYNETMTVE SVTQAVSNLA LQFG EEDADP G - AMSRPF 138  
 Oreochromis niloticus\_XP\_003441568 DSHIGCAMS G LIADAKTLID KARVETQNHW FTYNETMTVE SVTQAVSNLA LQFG EEDADP G - AMSRPF 138

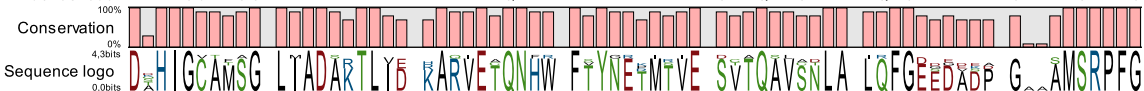

Caenorhabditis elegans\_NP\_492765 VAMLFAGVDQ EGAKLFLHDP SGTFLDCKAK SIIGASDGA E QNLKEQYHDA LTIKELKMA LAILKQVME 207  
 Arabidopsis thaliana\_NP\_188046 VSLILAGHDE NGPSLYYTD P SGTFWQCNAK AIGSGSEGAD SSLQEQFNKD ITLQEAETIA VSILKQVME 206  
 Drosophila melanogaster\_NP\_725669 VAILFAGIEA GQPQLWHMDDP SGTFRHGAK AIGSGSEGAQ QNLQDLFRPD LTLDEAIDIS LTLKQVME 210  
 Mus musculus\_NP\_036097 VALLFGGVDE KGPQLFHMDP SGTFLVQCDAR AIGSASEGAQ SSLQEVYHKS MTLKEAIKSS LTLKQVME 208  
 Homo sapiens\_NP\_002781 VALLFGGVDE KGPQLFHMDP SGTFLVQCDAR AIGSASEGAQ SSLQEVYHKS MTLKEAIKSS LTLKQVME 208  
 Xenopus laevis\_BAD42871 VALLFGGAE KGPQLFHMDP SGTFLVQCDAR AIGSASEGAQ SSLQEVYHKS MTLKEAIKSS LTLKQVME 208  
 Trematodus bernacchii VALLFGGVDE KGPQLYHMDP SGTFLVQCDAR AIGSASEGAQ SSLQEVYHKS MTLKDAIKSS LTLKQVME 208  
 Notothenia coriiceps\_XP\_01076620 VALLFGGVDE KGPQLYHMDP SGTFLVQCDAR AIGSASEGAQ SSLQEVYHKS MTLKDAIKSS LTLKQVME 208  
 Danio rerio\_NP\_991271 VALLFGGVDE KGPQLYHMDP SGTFLVQCDAR AIGSASEGAQ SSLQEVYHKS MTLKDAIKSS LTLKQVME 208  
 Oreochromis niloticus\_XP\_003441568 VALLFGGVDE KGPQLYHMDP SGTFLVQCDAR AIGSASEGAQ SSLQEVYHKS MTLKDAIKSS LTLKQVME 208

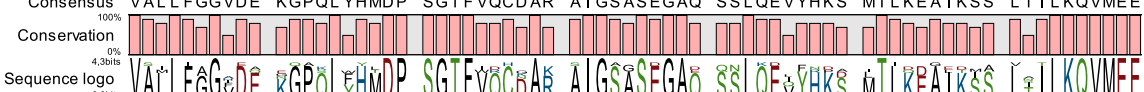

Caenorhabditis elegans\_NP\_492765 KLNANVEVYVIKPTVDKGRPIGEFTRVSN EELDQVITS L - 248  
 Arabidopsis thaliana\_NP\_188046 KVTNNVDIAKVAP - - - - A - - - - YHLYT PQEEAVISR L - 237  
 Drosophila melanogaster\_NP\_725669 KLNSTNVEVM TMTK - - - - E RE - - - FYMFT KEVEEQH IKN IA 244  
 Mus musculus\_NP\_036097 KLNATNIEA TVQP - - - - G QN - - - FHMFT KEEL EEV I KD I - 241  
 Homo sapiens\_NP\_002781 KLNATNIEA TVQP - - - - G QN - - - FHMFT KEEL EEV I KD I - 241  
 Xenopus laevis\_BAD42871 KLNATNIEA TVEP - - - - G KK - - - FHYMC KEEL EEV I KD I - 241  
 Trematodus bernacchii KLNATNIEA TVEP - - - - G KT - - - FHMFS KEEL EDV I KD I - 241  
 Notothenia coriiceps\_XP\_01076620 KLNATNIEA TVEP - - - - G KT - - - FHMFS KEEL EDV I KD I - 241  
 Danio rerio\_NP\_991271 KLNATNIEA TVEP - - - - G KT - - - FHMYS KEEL EDV I KD I - 241  
 Oreochromis niloticus\_XP\_003441568 KLNATNIEA TVEP - - - - G KT - - - FHMYS KEEL EEV I KD I - 241

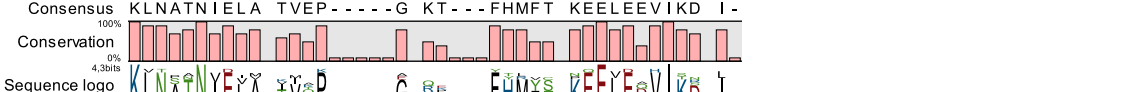

|                                    | 1  | 2     | 3     | 4     | 5     | 6     | 7     | 8      | 9     | 10    |
|------------------------------------|----|-------|-------|-------|-------|-------|-------|--------|-------|-------|
| Caenorhabditis elegans_NP_492765   | 1  | 52,82 | 55,95 | 60,64 | 60,24 | 60,24 | 59,84 | 59,84  | 59,84 | 60,64 |
| Arabidopsis thaliana_NP_188046     | 2  | 131   | 61,07 | 68,05 | 67,63 | 67,63 | 67,22 | 67,22  | 68,46 | 68,05 |
| Drosophila melanogaster_NP_725669  | 3  | 141   | 149   | 70,08 | 69,67 | 69,26 | 68,44 | 68,44  | 69,26 | 68,85 |
| Mus musculus_NP_036097             | 4  | 151   | 164   | 171   | 99,59 | 96,27 | 94,61 | 94,61  | 96,27 | 96,27 |
| Homo sapiens_NP_002781             | 5  | 150   | 163   | 170   | 240   | 95,85 | 94,19 | 94,19  | 95,85 | 95,85 |
| Xenopus laevis_BAD42871            | 6  | 150   | 163   | 169   | 232   | 231   | 94,61 | 94,61  | 96,27 | 96,68 |
| Trematomus bernacchii              | 7  | 149   | 162   | 167   | 228   | 227   | 228   | 100,00 | 97,10 | 97,10 |
| Notothenia coriiceps_XP_010766620  | 8  | 149   | 162   | 167   | 228   | 227   | 228   | 241    | 97,10 | 97,10 |
| Danio rerio_NP_991271              | 9  | 149   | 165   | 169   | 232   | 231   | 232   | 234    | 234   | 98,34 |
| Oreochromis niloticus_XP_003441568 | 10 | 151   | 164   | 168   | 232   | 231   | 233   | 234    | 234   | 237   |

**Figure S6. MUSCLE alignment of proteasome subunit alpha 5 amino acid sequences, with species names and accession numbers.** The consensus sequence, the conservation histogram and the sequence logo are shown at the bottom of the alignment. The Table in the last page contains the pairwise comparison of the sequences, with the number of identities (below the diagonal) and percent identity (above the diagonal).

Caenorhabditis elegans\_NP\_492360 - MNR Y DRA I T I F S P D G H L F Q V E Y A Q E A V K K G S T A V G V R G K D C I V I G V E K K S I P A L Q D D R T I R K I H M I D D H 69  
Drosophila melanogaster\_NP\_650910 M S S R Y G R A L T I F S P D G H L L Q V E Y A Q E A V R K G S T A V G V R G A N C V V L G V E K S S V S E M Q E D R T V R K I S M L D R H 70  
Arabidopsis thaliana\_NP\_190694 - M A R Y D R A I T V F S P D G H L F Q V E Y A L E A V R K G N A A V G V R G T D T V V L A V E K K S T P K L Q D S R S A R K I V S E D N H 69  
Xenopus laevis\_NP\_001081054 - - M S Y D R A I T V F S P D G H L F Q V E Y A Q E A V K K G S T A V G V R G K E I V V L G V E K K S V A K L Q D E R T V R K I C A L D E N 68  
Homo sapiens\_NP\_002783 - - M S Y D R A I T V F S P D G H L F Q V E Y A Q E A V K K G S T A V G V R G R D I V V L G V E K K S V A K L Q D E R T V R K I C A L D D N 68  
Mus musculus\_NP\_036099 - - M S Y D R A I T V F S P D G H L F Q V E Y A Q E A V K K G S T A V G V R G K D I V V L G V E K K S V A K L Q D E R T V R K I C A L D D N 68  
Notothenia coriiceps\_XP\_010783619 M A A R Y D R A I T V F S P D G H L F Q V E Y A Q E A V K K G S T A V G V R G K D I V V L G V E K K S V A K L Q E E R T V R K I C A L D E H 70  
Trematomus bernacchii M A A R Y D R A I T V F S P D G H L F Q V E Y A Q E A V K K G S T A V G V R G K D I V V L G V E K K S V A K L Q E E R T V R K I C A L D E H 70  
Oreochromis niloticus\_XP\_003438172 M A A R Y D R A I T V F S P D G H L F Q V E Y A Q E A V K K G S T A V G V R G K D I V V L G V E K K S V A K L Q E E R T V R K I C A L D E H 70  
Danio rerio\_NP\_998331 M A A R Y D R A I T V F S P D G H L F Q V E Y A Q E A V K K G S T A V G V R G K D I V V L G V E K K S V A K L Q E E R T V R K I C A L D E H 70

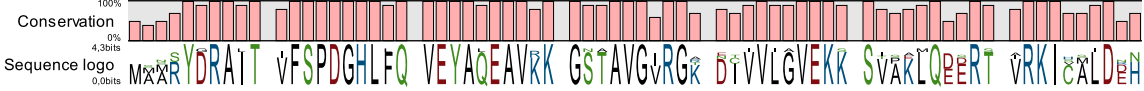

Caenorhabditis elegans\_NP\_492360 V M L A F A G L S A D A R V L V D R A R I E C Q S Y K L T E D P V T V A Y I S R Y I A N T K Q R F T Q S P G R R P F G I S M L I G G F D 138  
Drosophila melanogaster\_NP\_650910 V A L A F A G L T A D A R I L I N R G Q V E C Q S H R L N F E N Q V T L E Y I T R Y L A Q L K Q K Y T Q C N G R R P F G I S C L I G G I D 139  
Arabidopsis thaliana\_NP\_190694 I A L A C A G L K A D A R V L I N K A R I E C Q S H R L T V E D P V T V E Y I T R Y I A G L Q Q K Y T Q S G G V R P F G L S T L I V G F D P 139  
Xenopus laevis\_NP\_001081054 V F M A F A G L T A D A R I V I N R A R V E C Q S H R L T V E D P V T V E Y I T R Y I A S L K Q R Y T Q S N G R R P F G I S A L I V G F D 137  
Homo sapiens\_NP\_002783 V C M A F A G L T A D A R I V I N R A R V E C Q S H R L T V E D P V T V E Y I T R Y I A S L K Q R Y T Q S N G R R P F G I S A L I V G F D 137  
Mus musculus\_NP\_036099 V C M A F A G L T A D A R I V I N R A R V E C Q S H R L T V E D P V T V E Y I T R Y I A S L K Q R Y T Q S N G R R P F G I S A L I V G F D 137  
Notothenia coriiceps\_XP\_010783619 V C M A F A G L T A D A R I V I N R A R V E C Q S H R L T V E D P V T V E Y I T R Y I A T L K Q R Y T Q S N G R R P F G I S A L I V G F D 139  
Trematomus bernacchii V C M A F A G L T A D A R I V I N R A R V E C Q S H R L T V E D P V T V E Y I T R Y I A T L K Q R Y T Q S N G R R P F G I S A L I V G F D 139  
Oreochromis niloticus\_XP\_003438172 V C M A F A G L T A D A R I V I N R A R V E C Q S H R L T V E D P V T V E Y I T R Y I A T L K Q R Y T Q S N G R R P F G I S A L I V G F D 139  
Danio rerio\_NP\_998331 V C M A F A G L T A D A R I V I N R A R V E C Q S H R L T V E D P V T V E Y I T R Y I A T L K Q R Y T Q S N G R R P F G I S A L I V G F D 139

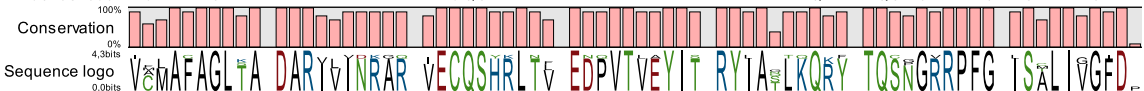

Caenorhabditis elegans\_NP\_492360 H D G T P R L F K T E P S G A Y E Y E V A N A T G R G E K P V R E Y L E E Q Y S E E N T V D E A T T L K L V I K S L A Q V V P P G S Q N I E 208  
Drosophila melanogaster\_NP\_650910 A D G S A R L F H T E P S G T F H E Y K A T A T G R W A N T V R E F F E K A Y S D H E V T T K C D A I K L A M R A L L E V T Q M S Q M R L E 209  
Arabidopsis thaliana\_NP\_190694 Y T R I P A L Y Q T D P S G T F S A W K A N A T G R N S N S A N A T G R N S N S V R E F L E K N Y T E S A - - - G Q E T V K L A I R A L L E V V E S G G K N I E 206  
Xenopus laevis\_NP\_001081054 F D G T P R L Y Q T D P S G T Y H A W K A N A I G R G A K S V R E F L E K H Y T D E A I E T D D T I K L V I K A L L E V V Q S G G K N I E 207  
Homo sapiens\_NP\_002783 F D G T P R L Y Q T D P S G T Y H A W K A N A I G R G A K S V R E F L E K N Y T D E A I E T D D T I K L V I K A L L E V V Q S G G K N I E 207  
Mus musculus\_NP\_036099 F D G T P R L Y Q T D P S G T Y H A W K A N A I G R G A K S V R E F L E K N Y T D D A I E T D D T I K L V I K A L L E V V Q S G G K N I E 207  
Notothenia coriiceps\_XP\_010783619 D D G T P R L Y Q T D P S G T Y H A W K A N A I G R S A K T V R E F L E K N Y T D E A I A G D N E T I K L T I K A L L E V V Q S G G K N I E 209  
Trematomus bernacchii D D G T P R L Y Q T D P S G T Y H A W K A N A I G R S A K T V R E F L E K N Y T D E A I A G D N E T I K L T I K A L L E V V Q S G G K N I E 209  
Oreochromis niloticus\_XP\_003438172 Y D G T P R L Y Q T D P S G T Y H A W K A N A I G R S A K T V R E F L E K N Y T E E A I A G D N E A I K L A I K A L L E V V Q S G G K N I E 209  
Danio rerio\_NP\_998331 Y D G T P R L Y Q T D P S G T Y H A W K A N A I G R S A K T V R E F L E K N Y T D E A I A S D N D A I K L A I K A L L E V V Q S G G K N I E 209

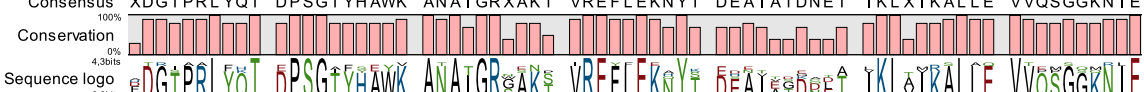

Caenorhabditis elegans\_NP\_492360 I A V M K K Y N D E L Q Q R V L S T E E I E A L L K V V E T E R V A A - E A E E A A S K K K 253  
Drosophila melanogaster\_NP\_650910 V A V L E N - - G K P - M K M D S V Y S E I V K L V Q N E K E L Q A K A H K M K - R - - 249  
Arabidopsis thaliana\_NP\_190694 V A V M T R - - E E G V L K Q E E E E I D I I V A E I E A E K A A A E A A K K G P A K E T 250  
Xenopus laevis\_NP\_001081054 L A V M R R - - D Q P - L K T L N P E E I E R Y V A E I E K E K E E N - E K K K Q K - K T T 248  
Homo sapiens\_NP\_002783 L A V M R R - - D Q S - L K I L N P E E I E K Y V A E I E K E K E E N - E K K K Q K - K A S 248  
Mus musculus\_NP\_036099 L A V M R R - - D Q P - L K I L N P E E I E K Y V A E I E K E K E E N - E K K K Q K - K A S 248  
Notothenia coriiceps\_XP\_010783619 L A I T R R - - N K P - L K I L E A K E I E S L V A E I E K E K E E E A E K K K Q K G K S T 252  
Trematomus bernacchii L A I T R R - - N K P - L K I L E A K E I E S L V A E I E K E K E E E A E K K K Q K G K S T 252  
Oreochromis niloticus\_XP\_003438172 L A V R R - - N Q P - L K I L E S K E I E T L V T E I E K E K E E E A E K K K Q K - K S T 251  
Danio rerio\_NP\_998331 L A V R R - - N Q P - L K I L E S K E I E T L V A E I E K E K E E E A E K K K Q K - K S S 251

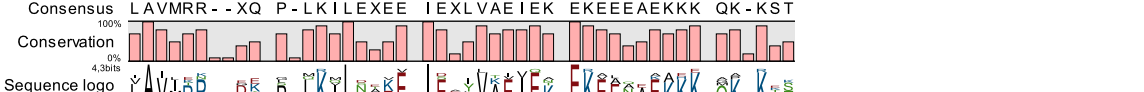

|                                    | 1  | 2     | 3     | 4     | 5     | 6     | 7     | 8      | 9     | 10    |
|------------------------------------|----|-------|-------|-------|-------|-------|-------|--------|-------|-------|
| Caenorhabditis elegans_NP_492360   | 1  | 50,20 | 54,51 | 59,68 | 60,08 | 60,08 | 57,65 | 57,65  | 58,04 | 57,65 |
| Drosophila melanogaster_NP_650910  | 2  | 128   | 51,57 | 58,17 | 57,77 | 58,17 | 59,52 | 59,52  | 60,56 | 61,35 |
| Arabidopsis thaliana_NP_190694     | 3  | 139   | 131   | 65,61 | 66,01 | 66,01 | 65,75 | 65,75  | 66,54 | 65,75 |
| Xenopus laevis_NP_001081054        | 4  | 151   | 146   | 166   | 96,37 | 96,77 | 87,30 | 87,30  | 87,25 | 87,65 |
| Homo sapiens_NP_002783             | 5  | 152   | 145   | 167   | 239   | 98,79 | 86,90 | 86,90  | 86,85 | 88,05 |
| Mus musculus_NP_036099             | 6  | 152   | 146   | 167   | 240   | 245   | 87,30 | 87,30  | 87,25 | 88,45 |
| Notothenia coriiceps_XP_010783619  | 7  | 147   | 150   | 167   | 220   | 219   | 220   | 100,00 | 96,03 | 95,63 |
| Trematomus bernacchii              | 8  | 147   | 150   | 167   | 220   | 219   | 220   | 252    | 96,03 | 95,63 |
| Oreochromis niloticus_XP_003438172 | 9  | 148   | 152   | 169   | 219   | 218   | 219   | 242    | 242   | 98,01 |
| Danio rerio_NP_998331              | 10 | 147   | 154   | 167   | 220   | 221   | 222   | 241    | 241   | 246   |

**Figure S7. MUSCLE alignment of proteasome alpha 7 subunit amino acid sequences, with species names and accession numbers.** The consensus sequence, the conservation histogram and the sequence logo are shown at the bottom of the alignment. The Table in the last page contains the pairwise comparison of the sequences, with the number of identities (below the diagonal) and percent identity (above the diagonal).

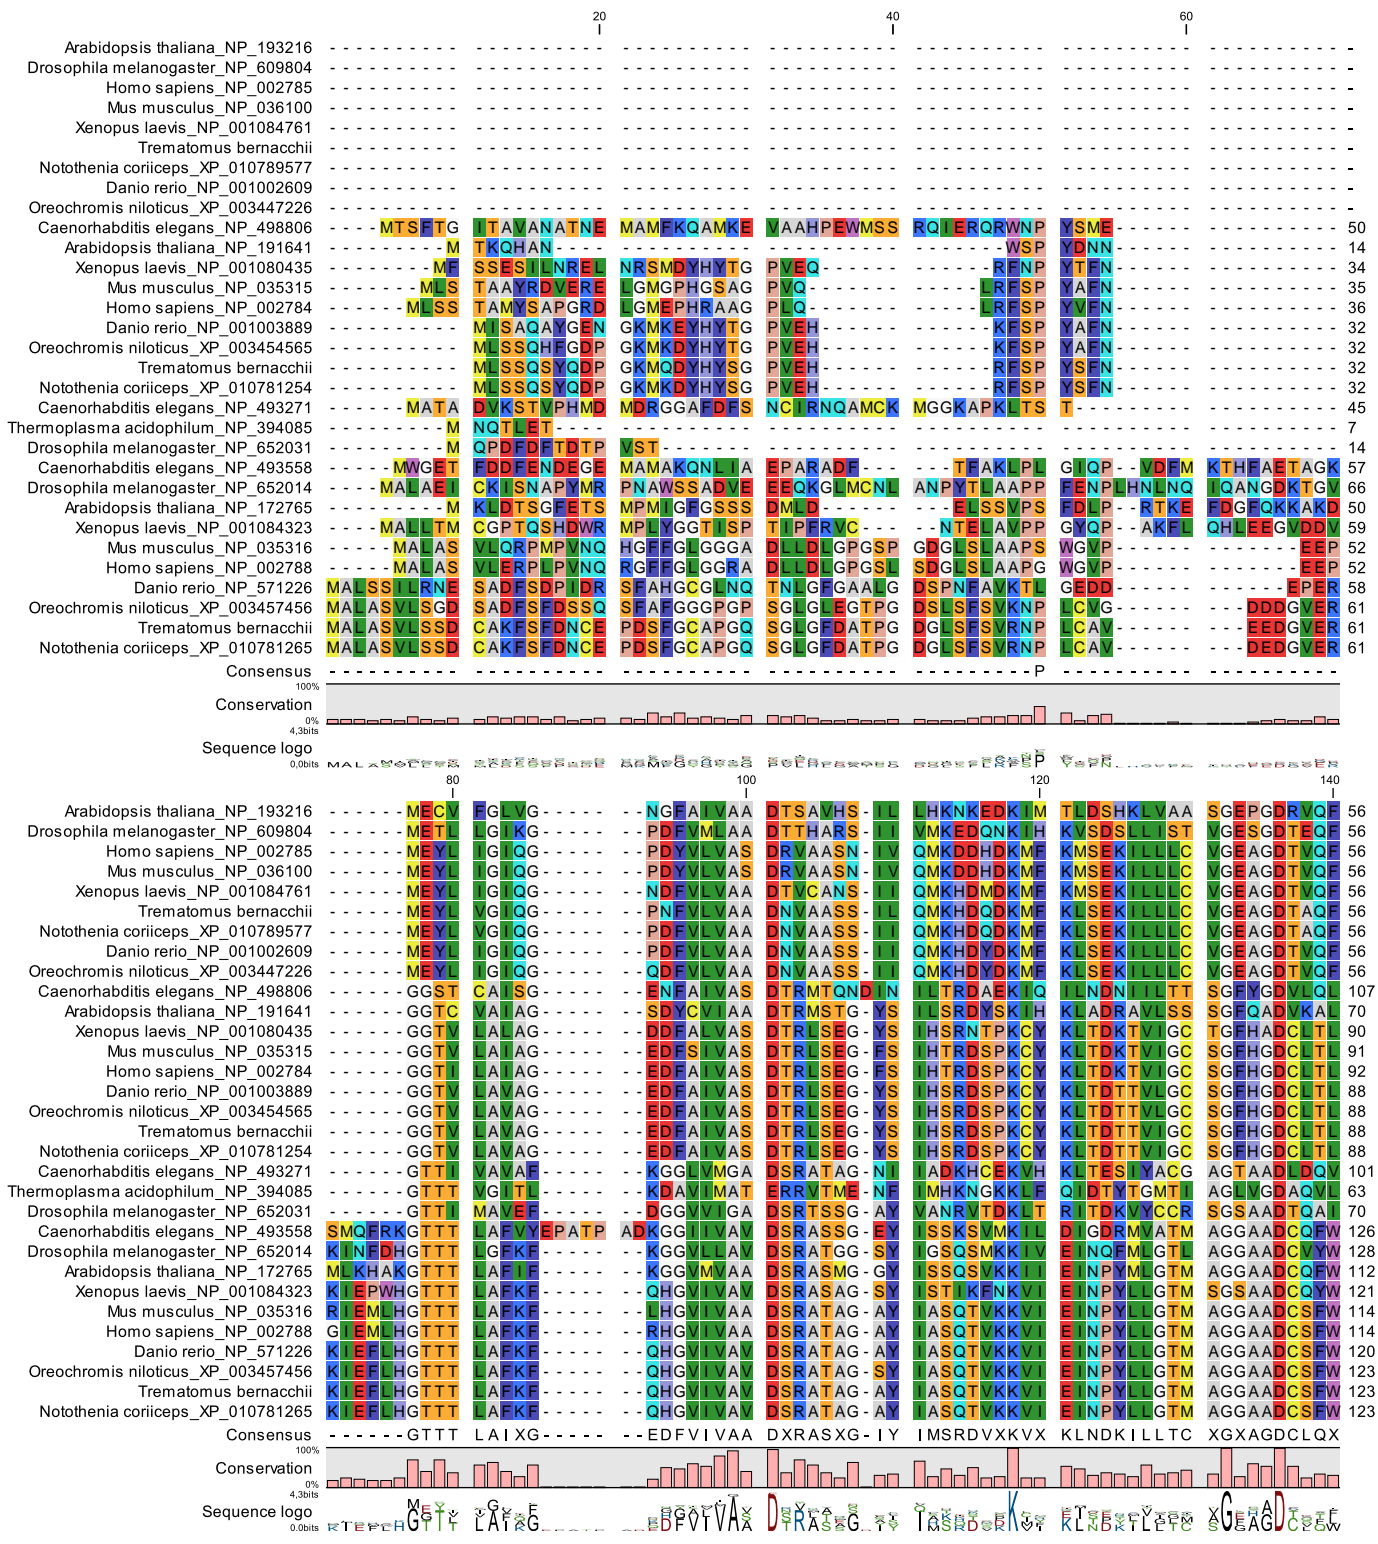



|                                    |             |            |             |            |            |            |             |     |
|------------------------------------|-------------|------------|-------------|------------|------------|------------|-------------|-----|
|                                    |             |            | 160         |            | 180        |            | 200         |     |
| Arabidopsis thaliana_NP_193216     | TEYVQKNVSL  | YQFRNGTPLS | TAAAAANFTRG | ELA-TALRKN | PYSVNLMLAG | YDKEAGASLY | YID-YIATLH  | 124 |
| Drosophila melanogaster_NP_609804  | TEFVSKNIAL  | YKMRNGYDLS | PRESAHFTRK  | NLAELYLRST | PYQVFMFVAG | YDPNAGPELT | FID-YLANAL  | 125 |
| Homo sapiens_NP_002785             | AEYVQKNVQL  | YKMRNGYELS | PTAAANFTRR  | NLADCLRSRT | PYHVNLLIAG | YDEHEGPALY | YMD-YLAAAL  | 125 |
| Mus musculus_NP_036100             | AEYVQKNVQL  | YKMRNGYELS | PTAAANFTRR  | NLADCLRSRT | PYHVNLLIAG | YDEHEGPALY | YMD-YLAAAL  | 125 |
| Xenopus laevis_NP_001084761        | AEYVQKNVQL  | YKMRNGYELS | PTAAANFTRR  | NLADYLRST  | PYHVNLLIAG | YDEHAGPSLY | YMD-YLSALA  | 125 |
| Trematomus bernacchii              | AEYVQKNLQL  | YKMRNGYELS | PSAAANFTRK  | NLADYLRST  | PYHVNLLIAG | YDETDGPGLY | YMD-YLSSIS  | 125 |
| Notothenia coriiceps_XP_010789577  | AEYVQKNLQL  | YKMRNGYELS | PSAAANFTRK  | NLADYLRST  | PYHVNLLIAG | YDETDGPGLY | YMD-YLSSIS  | 125 |
| Danio rerio_NP_001002609           | AEYVQKNVQL  | YKMRNGYELS | PAAAAANFTRK | NLADYLRST  | PYHVNLLIAG | YDETDGPGLY | YMD-YLSALA  | 125 |
| Oreochromis niloticus_XP_003447226 | AEYVQKNVQL  | YKMRNGYELS | PAAAAANFTRK | NLADYLRST  | PYHVNLLIAG | YDDTDGPGLY | YMD-HLSSLA  | 125 |
| Caenorhabditis elegans_NP_498806   | KKVLSRSLHK  | YRFDRSDMS  | VDLCAELLSR  | NL--YRFRFF | PYYTGALLAG | LDEH-GKGA  | YSYDPLGLE   | 174 |
| Arabidopsis thaliana_NP_191641     | QKVLKSRHLI  | YQHGHKQMS  | CPAMAQLLSN  | TL--YFKRFF | PYYAFNLVGG | LDEE-GKGV  | FTYDAVGSYE  | 137 |
| Xenopus laevis_NP_001080435        | TKILTEARLKM | YKHSNNKTMT | SGAIAAMLST  | TL--YSRRFF | PYYVYNIIGG | LDEE-GKGA  | YSFDPVGSYQ  | 157 |
| Mus musculus_NP_035315             | TKILTEARLKM | YKHSNNKAMT | TGAIAAMLST  | TL--YSRRFF | PYYVYNIIGG | LDEE-GKGA  | YSFDPVGSYQ  | 158 |
| Homo sapiens_NP_002784             | TKILTEARLKM | YKHSNNKAMT | TGAIAAMLST  | TL--YSRRFF | PYYVYNIIGG | LDEE-GKGA  | YSFDPVGSYQ  | 159 |
| Danio rerio_NP_001003889           | TKILTEARLKM | YKHSNNKAMT | TGAIAAMLST  | TL--YSRRFF | PYYVYNIIGG | LDEE-GKGA  | YSFDPVGSYQ  | 155 |
| Oreochromis niloticus_XP_003454565 | TKILTEARLKM | YKHSNNKTMT | SGAIAAMLST  | TL--YSRRFF | PYYVYNIIGG | LDEE-GKGA  | YSFDPVGSYQ  | 155 |
| Trematomus bernacchii              | TKILTEARLKM | YKHSNNKTMT | SNAIAAMLST  | TL--YGRFF  | PYYVYNIIGG | LDEH-GKGA  | YSFDPVGSYQ  | 155 |
| Notothenia coriiceps_XP_010781254  | TKILTEARLKM | YKHSNNKTMT | SNAIAAMLST  | TL--YGRFF  | PYYVYNIIGG | LDEH-GKGA  | YSFDPVGSYQ  | 155 |
| Caenorhabditis elegans_NP_493271   | TKMLSGNRLI  | LELNTGRKAR | VITALRQAKQ  | HL--FNYQGY | -GAYLLVGG  | YDPT-GPHLY | MCSANGTITMA | 167 |
| Thermoplasma acidophilum_NP_394085 | VRVMKAELE   | YRLQRRVMP  | TEAVATLSN   | ML--NQVKYM | PYMVQLVGG  | IDT--APHVF | SIDAAGGSVE  | 129 |
| Drosophila melanogaster_NP_652031  | ADIVAYSINLY | HENQTNKDAL | VEFAASEERN  | YC--YSYR-E | SLLAGTIVAG | WDEQRGGQVY | SIP-LGGMLT  | 136 |
| Caenorhabditis elegans_NP_493558   | TRIVAKYCTL  | YELREKTSIT | VAASKYFAN   | TL--HEYRGG | GLSFGSMVAG | YDKK-GPFI  | KVDSEGRQC   | 193 |
| Drosophila melanogaster_NP_652014  | DRVLSKECRL  | HELNRKERTS | VAAASKIMAN  | IA--HGKGM  | GLSMGMMLAG | YDKR-GPGLY | YVDSEGRTP   | 195 |
| Arabidopsis thaliana_NP_172765     | HRNLGKCRLL  | HELANKRRIS | VGASKLLAN   | ML--YSYRGM | GLSFGTMVAG | WDET-GPGLY | YVDNEGRLLK  | 179 |
| Xenopus laevis_NP_001084323        | ERLLAKECRL  | YQLRNNSTRS | VAAASKMCN   | MM--LQYRGT | GLSFGSMVAG | WDKK-GPGLY | YVDNNGTRLC  | 188 |
| Mus musculus_NP_035316             | ERLLARQCCRJ | YELRNKERIS | VAAASKLLAN  | MV--YQYKGM | GLSMGTMVCG | WDKR-GPGLY | YVDSEGNRIS  | 181 |
| Homo sapiens_NP_002788             | ERLLARQCCRJ | YELRNKERIS | VAAASKLLAN  | MV--YQYKGM | GLSMGTMVCG | WDKR-GPGLY | YVDSEGNRIS  | 181 |
| Danio rerio_NP_571226              | ERLLARQCCRJ | YELRNKERIS | VAAASKLLAN  | MV--YQYKGM | GLSMGTMVCG | WDKR-GPGLY | YVDSEGNRVC  | 187 |
| Oreochromis niloticus_XP_003457456 | ERLLARQCCRJ | YELRNKERIS | VAAASKLLAN  | MV--YQYKGM | GLSMGTMVCG | WDKR-GPGLY | YVDSEGNRVC  | 190 |
| Trematomus bernacchii              | ERLLARQCCRJ | YELRNKERIS | VAAASKLLAN  | MV--YQYKGM | GLSMGTMVCG | WDKR-GPGLY | YVDSEGNRVC  | 190 |
| Notothenia coriiceps_XP_010781265  | ERLLARQCCRJ | YELRNKERIS | VAAASKLLAN  | MV--YQYKGM | GLSMGTMVCG | WDKR-GPGLY | YVDSEGNRVC  | 190 |
| Consensus                          | TRXIXKNLRL  | YKLRNXKRXS | VAAAAKLLXN  | XL--YXRRGX | PYSVGLXIAG | YDEX-GPGLY | YVDDEGGSLLQ |     |

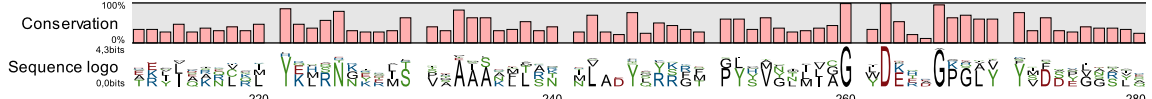

|                                    |            |            |           |            |            |            |            |            |     |
|------------------------------------|------------|------------|-----------|------------|------------|------------|------------|------------|-----|
|                                    |            |            | 220       |            | 240        |            | 260        |            | 280 |
| Arabidopsis thaliana_NP_193216     | KVDKGAFGYG | SYFSSTMDR  | HY-----   | -----      | RSDMS      | VEEALELDV  | CILELRSLV  | IAPPNFVKI  | 181 |
| Drosophila melanogaster_NP_609804  | PVNYAGHYG  | AIFASSYDR  | YV-----   | -----      | HPNIT      | QAEAMDVFKK | CIAEQKRLV  | VNLKNFTAV  | 182 |
| Homo sapiens_NP_002785             | KAPFAAHGYG | AFLTSLDR   | YY-----   | -----      | TPTIS      | RERAEELLRK | CLEELQKRFI | NLPTFSVRI  | 182 |
| Mus musculus_NP_036100             | KAPFAAHGYG | AFLTSLDR   | YY-----   | -----      | TPTIS      | RERAEELLRK | CLEELQKRFI | NLPTFSVRI  | 182 |
| Xenopus laevis_NP_001084761        | KTRFAAHGYG | AYTSLDR    | YY-----   | -----      | KPDLT      | REDAVELKK  | CISEQKRFI  | NLPSFTVRV  | 182 |
| Trematomus bernacchii              | KAPFAAHGYG | AFLTSLDQ   | HY-----   | -----      | KPDLT      | REEAVDLKK  | CIEELRKRFI | NLPSFTVRL  | 182 |
| Notothenia coriiceps_XP_010789577  | KAPFAAHGYG | AFLTSLDQ   | HY-----   | -----      | KPDLT      | REEAVDLKK  | CIEELRKRFI | NLPSFTVRL  | 182 |
| Danio rerio_NP_001002609           | KAPFAAHGYG | AFLTSLDR   | YY-----   | -----      | RPDLT      | REEAVDLKK  | CLEELNKRFI | NLPSFTVRL  | 182 |
| Oreochromis niloticus_XP_003447226 | KAPFAAHGYG | AYTSLDR    | YY-----   | -----      | RPDLT      | RDEAVDLKK  | CVEEKRFI   | NLPSFTVRL  | 182 |
| Caenorhabditis elegans_NP_498806   | RIGYSASGAA | EPMTIPLDC  | QIHVTS--  | -EGVERPEIT | LDRAISLMKD | SFRGAAEREI | STGDKIHLVI | 241        |     |
| Arabidopsis thaliana_NP_191641     | RVGCAQSSG  | STLIMPLDN  | QLKSPSLLL | PKQDSNTPLS | EAEAMDVFKT | VFASATERDI | YTGDKLEIM  | 207        |     |
| Xenopus laevis_NP_001080435        | RDAFKAGGSA | SAMLQPLDN  | QIGYKNM-- | -QNVNQLPLT | LEKALKIKD  | VFISAAERDV | YTGDKALRCI | 223        |     |
| Mus musculus_NP_035315             | RDSFKAGGSA | SAMLQPLDN  | QIGYKNM-- | -QNVNQLPLT | LEKALKIKD  | VFISAAERDV | YTGDKALRCI | 224        |     |
| Homo sapiens_NP_002784             | RDSFKAGGSA | SAMLQPLDN  | QIGYKNM-- | -QNVNQLPLT | LEKALKIKD  | VFISAAERDV | YTGDKALRCI | 225        |     |
| Danio rerio_NP_001003889           | RDTYKAGGSA | SAMLQPLDN  | QIGYKNM-- | -ENVEHVPLT | QEKAVQLVKD | VFISAAERDV | YTGDKALRCI | 221        |     |
| Oreochromis niloticus_XP_003454565 | RDTYKAGGSA | SAMLQPLDN  | QIGYKNM-- | -ENVEHVPLT | QEKAVQLVKD | VFISAAERDV | YTGDKALRCI | 221        |     |
| Trematomus bernacchii              | RDTYKAGGSA | SAMLQPLDN  | QIGYKNM-- | -EGVHVPLT  | KDKAVQLVKD | VFISAAERDV | YTGDKALRCI | 221        |     |
| Notothenia coriiceps_XP_010781254  | RDTYKAGGSA | SAMLQPLDN  | QIGYKNM-- | -EGVHVPLT  | QERAVQLVKD | VFISAAERDV | YTGDKALRCI | 221        |     |
| Caenorhabditis elegans_NP_493271   | -FPFTAQSSG | SYAAITLER  | DF-----   | -----      | KVDMT      | KDEAEKLVQR | ALVAGMHGDN | ASGNSLNLI  | 223 |
| Thermoplasma acidophilum_NP_394085 | -DJYASTGSS | SPFYGVLES  | QY-----   | -----      | SEKMT      | VDEGVDLVR  | AISAAKQSDS | ASGGMDLAV  | 185 |
| Drosophila melanogaster_NP_652031  | RESCITGSSG | SSFIYGFRE  | HY-----   | -----      | RPNMA      | VEDCMTFVKK | AVQHAIVHDG | SSGGVVRIG  | 193 |
| Caenorhabditis elegans_NP_493558   | KVCSV-GSS  | SLNAYGLDN  | HY-----   | -----      | KPKMT      | DDEARKLGLR | AIMHATYRDS | GSGGVCNLCH | 249 |
| Drosophila melanogaster_NP_652014  | GNLFSV-GSS | SLYAYGLDS  | GY-----   | -----      | HWDLT      | DKEAQELGRR | AIYHATERDA | YSGGITRYVH | 251 |
| Arabidopsis thaliana_NP_172765     | GDRFSV-GSS | SPYAYGLDS  | GY-----   | -----      | KYDMS      | VEEASELARR | SIYHATERDG | ASGGVASYVH | 235 |
| Xenopus laevis_NP_001084323        | GDLFST-GSS | NSYAYGVMS  | GY-----   | -----      | RFDLT      | PEEAVDGLRR | AIYATHRDA  | YSGGCVNLVH | 244 |
| Mus musculus_NP_035316             | GTAFSV-GSS | SVYAYGVMDR | GY-----   | -----      | SYDLK      | VEEAYDLARR | AIYQATYRDA | YSGGAVNLVH | 237 |
| Homo sapiens_NP_002788             | GATFSV-GSS | SVYAYGVMDR | GY-----   | -----      | SYDLE      | VEQAVDLARR | AIYQATYRDA | YSGGAVNLVH | 237 |
| Danio rerio_NP_571226              | GDLFAM-GSS | SMYAYGVMS  | GY-----   | -----      | RYDLT      | IDEACDLGRR | AIYQATYRDA | YSGGQVNLVH | 243 |
| Oreochromis niloticus_XP_003457456 | GDLFAM-GSS | SMYAYGVMS  | GY-----   | -----      | RHDLT      | VEEACEGLRR | AIYQATYRDA | YSGGQVNLVH | 246 |
| Trematomus bernacchii              | GDLFAM-GSS | SMYAYGVMS  | GY-----   | -----      | RQDLT      | VEEACEGLRR | AIYQATYRDA | YSGGQVNLVH | 246 |
| Notothenia coriiceps_XP_010781265  | GDLFAM-GSS | SMYAYGVMS  | GY-----   | -----      | RQDLT      | VEEACEGLRR | AIYQATYRDA | YSGGQVNLVH | 246 |
| Consensus                          | RDPFAA-GSS | SAYAYGXLDL | QY-----   | -----      | RPDLT      | VEEAVDLVCR | AIYEATERDX | YSGGAXNXYI |     |

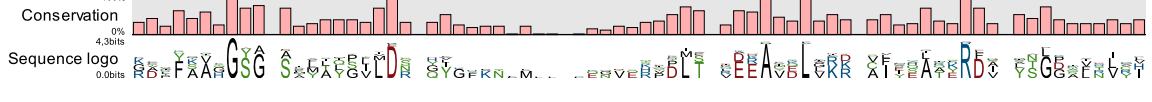



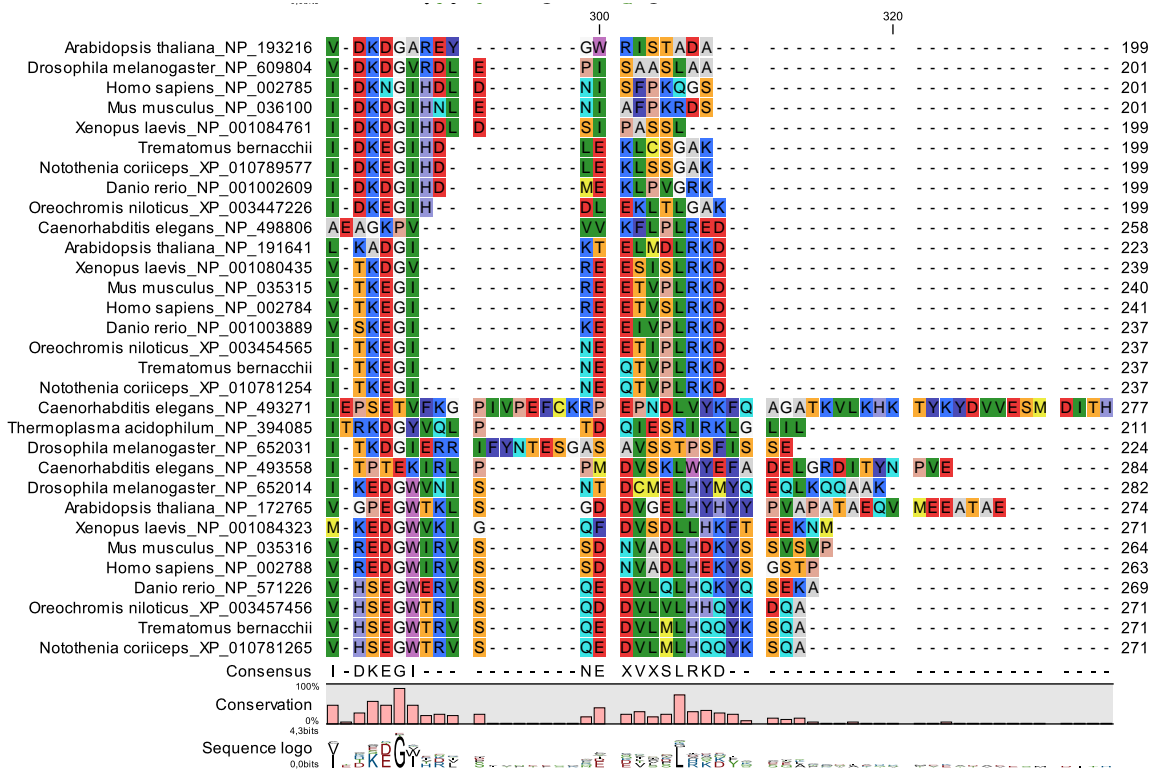

**Figure S8. MUSCLE alignment of the catalytic proteasome subunits, with species names and accession numbers, utilized for the phylogenetic analysis.**

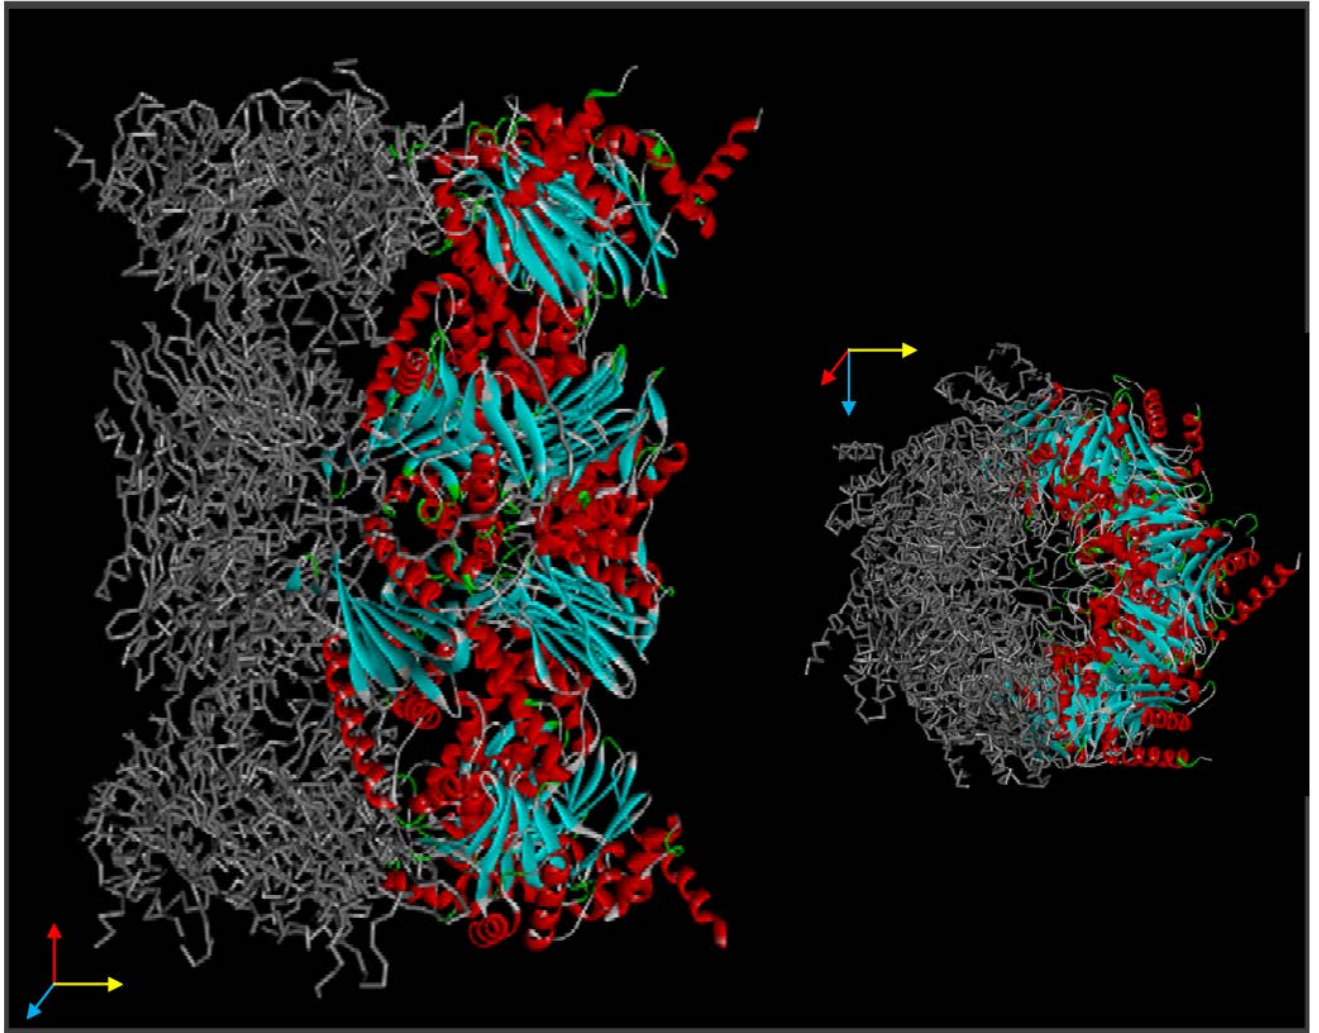

**Figure S9. Theoretical assembly of the seven modelled chains of *T. bernacchii* proteasome (in red, alpha helices; in cyan, beta strands).** The assembly is based on the reference structure of mouse whole proteasome (PDB code: 3UNB). The simple backbone (in grey) of the corresponding mouse chains is shown for the remaining chains (not modelled).
